# Supplementary material for: Different anion (NO3− and OAc−)-controlled construction of dysprosium clusters with different shapes
Source: Royal Society of Chemistry journal article supplement (doi:10.1039/d3dt03314g), 2024-01-01
Supplement: d3dt03314g1.pdf [file d3dt03314g1.pdf]

## Supporting Information

### **Different Anions ( $\text{NO}_3^-$ and $\text{OAc}^-$ ) Controlled Construction of Series of Dysprosium Clusters with Different Shapes**

Jia-Nan Xie,<sup>+</sup> Yun-Lan Li,<sup>+</sup> Hai-Ling Wang, Zi-Xin Xiao, Zhong-Hong Zhu\*, Fu-Pei Liang, and Hua-Hong Zou\*

School of Chemistry and Pharmaceutical Sciences, State Key Laboratory for Chemistry and Molecular Engineering of Medicinal Resources, Guangxi Normal University, Guilin 541004, P. R. China \*E-mail (Corresponding author): [18317725515@163.com](mailto:18317725515@163.com) (Z.-H. Zhu), [gxnuchem@foxmail.com](mailto:gxnuchem@foxmail.com) (H.-H. Zou).

**Keywords:** Lanthanide clusters; Substituent and anions regulation; Solvothermal synthesis; Annular growth mechanism; Magnetic properties.

## Table of Contents:

| Supporting Tables  |                                                                                                                                                                        |
|--------------------|------------------------------------------------------------------------------------------------------------------------------------------------------------------------|
| <b>Table S1</b>    | Crystallographic data of the clusters <b>1–3</b> .                                                                                                                     |
| <b>Table S2</b>    | Selected bond lengths (Å) and angles (°) of clusters <b>1–3</b> .                                                                                                      |
| <b>Table S3</b>    | <i>SHAPE</i> analysis of the Dy(III) in cluster <b>1</b> .                                                                                                             |
| <b>Table S4</b>    | <i>SHAPE</i> analysis of the Dy(III) in cluster <b>2</b> .                                                                                                             |
| <b>Table S5</b>    | <i>SHAPE</i> analysis of the Dy(III) in cluster <b>3</b> .                                                                                                             |
| <b>Table S6</b>    | The parameters XT, XS, alpha and tau.                                                                                                                                  |
| <b>Note 1</b>      | SQUEEZE and “Use Solvent Mask results” results for cluster <b>1–3</b> .                                                                                                |
| Supporting Figures |                                                                                                                                                                        |
| <b>Figure S1</b>   | Comparison of data between the first refinement (A) and the second refinement (B).                                                                                     |
| <b>Figure S2</b>   | Comparison of data between the first refinement (A) and the second refinement (B).                                                                                     |
| <b>Figure S3</b>   | IR spectra of clusters <b>1–5</b> .                                                                                                                                    |
| <b>Figure S4</b>   | Thermogravimetric curves of clusters <b>1–5</b> .                                                                                                                      |
| <b>Figure S5</b>   | Powder X-ray diffraction patterns (PXRD) of clusters <b>1–5</b> .                                                                                                      |
| <b>Figure S6</b>   | Temperature dependence of $\chi_m T$ for <b>4</b> and <b>5</b> (A and B).                                                                                              |
| <b>Figure S7</b>   | <i>M</i> vs. <i>H/T</i> plots of clusters <b>1–3</b> (A–C).                                                                                                            |
| <b>Figure S8</b>   | <i>M</i> vs. <i>H/T</i> plots of clusters <b>4</b> and <b>5</b> (A and B).                                                                                             |
| <b>Figure S9</b>   | Loop curve graph of clusters <b>1–3</b> at 2 K.                                                                                                                        |
| <b>Figure S10</b>  | Temperature dependence of the real ( $\chi'$ ) and imaginary ( $\chi''$ ) ac susceptibilities at different frequencies in the 0 Oe dc fields for clusters <b>1–3</b> . |
| <b>Figure S11</b>  | Frequency-dependent $\chi'$ and $\chi''$ curves under zero fields for clusters <b>1–3</b> .                                                                            |
| <b>Figure S12</b>  | Energy barrier fits under 0 Oe dc field for clusters <b>1–3</b> .                                                                                                      |

## Experimental Section

### Materials and Measurements.

All reagents were obtained from commercial sources and used without further purification. Elemental analyses for C, and H were performed on a varia MICRO cube. The infrared spectra were carried out on a Pekin-Elmer Two spectrophotometer with pressed KBr pellets. The X-ray powder diffraction (XRD) spectra were measured on a Rigaku D/Max-3c diffractometer with Mo K $\alpha$  radiation ( $\lambda = 0.71073 \text{ \AA}$ ). Thermogravimetric analyses were performed on a PerkinElmer PyrisDiamond TG-DTA instrument under an N<sub>2</sub> atmosphere using a heating rate of 5 °C min<sup>-1</sup> from room temperature up to 1000 °C. Magnetic properties were performed on a Superconducting Quantum Interference Device (SQUID) magnetometer. The diamagnetism of all constituent atoms was corrected with Pascal's constant.

### Single crystal X-ray crystallography.

Since the crystals were obviously deteriorated, the structural single crystals of compounds **1–3** were taken out together with the mother liquor, and then the single crystals with the mother liquor were quickly dispersed into dimethicone, and then the crystals were installed in the LOOP ring. Diffraction data for the compounds **1–3** was collected on a ROD, Synergy Custom DW system, HyPix diffractometer (Cu-K $\alpha$  radiation and  $\lambda = 1.54 \text{ \AA}$ ; and Ga-K $\alpha$  radiation) in  $\Phi$  and  $\omega$  scan modes. The structures solved by empirical absorption correction using spherical harmonics, implemented in SCALE3 ABSPACK scaling algorithm. All the processed data were solved by SHELXT intrinsic phasing, and the refinement was done by full-matrix least squares on  $F^2$  (SHELXL) in the Olex2 software. A solvent mask based on Platon SQUEEZE The SWAT correction was applied during the refinement for addressing the effect of diffusing solvent in the void. Anisotropic thermal parameters were applied to all non-hydrogen atoms. Hydrogen atoms were generated geometrically. The visualization of all the crystal structures was fulfilled by Olex2 as well. The crystallographic data for clusters **1–3** are listed in Table S1, and selected bond lengths and angles are given in Table S2. The CCDC reference numbers for the crystal structures of clusters **1–3** are 2291287, 2277280, and 2291288, respectively.

The structures were refined based on the following considerations. Atoms are assigned based on the results obtained by the instrument and in conjunction with the reaction materials used.

Subsequently, all non-hydrogen atoms are anisotropically generated, and hydrogen atoms are generated geometrically. Limits are imposed on individual C–C and C–N bond lengths. Especially for the terminal ends of the ligands and -CH<sub>3</sub> of the solvent molecules, there is significant disorder, resulting in atomic movement and unstable refinement. In addition, unreasonable atoms are manually modeled in idealized positions based on reasonable bond length and bond angle parameters. Model disordered benzene rings based on the initial Q peak. The last step of purification is to perform unrestricted purification of the ligand and fix the -CH<sub>3</sub> at the end of the benzene ring. The purpose of this treatment was to generate chemically reasonable models without disorder.

**CheckCif alert is listed according to Alert Level B for compound complex 2**

PLAT420\_ALERT\_2\_B D-H Bond Without Acceptor O18 --H18B. Please Check

**Response:** The solvent molecules are highly disordered, which supposed to form hydrogen bond with water molecules, but they have been removed using the “Use Solvent Mask” command.

**CheckCif alert is listed according to Alert Level B for compound complex 3**

RINTA01\_ALERT\_3\_A The value of R<sub>int</sub> is greater than 0.25      R<sub>int</sub> given      0.298

**Response:** The overall quality of the data was poor due to the highly sensitive and unstable nature of the compound that rendered the crystal quality low. Crystals diffracted extremely weakly and disintegrated during the data collection. Multiple attempts were made to grow better diffracting crystals, however, all this creates serious problems when mounted, as the crystal structure is sensitive to oxygen in the air and the loss of solvent molecules makes the crystal highly unstable. This resulted in weak diffraction and disorder in the solvent atom positions. In addition, due to the high degree of disorder in the benzene ring molecules in the ligand, and the obvious disorder of -CH<sub>3</sub> at the end, the atomic movement and refinement are unstable. These factors resulted in high R<sub>int</sub> value.

PLAT020\_ALERT\_3\_A The Value of R<sub>int</sub> is Greater Than 0.12 .....      0.298 Report

**Response:** The overall quality of the data was poor due to the highly sensitive and unstable nature of the compound that rendered the crystal quality low. Crystals diffracted extremely weakly and disintegrated during the data collection. Multiple attempts were made to grow better diffracting

crystals, however, all this creates serious problems when mounted, as the crystal structure is sensitive to oxygen in the air and the loss of solvent molecules makes the crystal highly unstable. This resulted in weak diffraction and disorder in the solvent atom positions. In addition, due to the high degree of disorder in the benzene ring molecules in the ligand, and the obvious disorder of -CH<sub>3</sub> at the end, the atomic movement and refinement are unstable. These factors resulted in high  $R_{\text{int}}$  value.

PLAT084\_ALERT\_3\_A High  $wR_2$  Value (i.e. > 0.25) ..... 0.47 Report

**Response:** Generally speaking, the  $wR_2$  value is about twice the  $R_1$  value. Therefore, we have done refinement of the weights and checked the model to ensure that  $wR_2$  still exhibits a high value in the correct case. We believe that the quality of data is a reason that affects the  $wR_2$  value. This is mainly because: The overall quality of the data was poor due to the highly sensitive and unstable nature of the compound that rendered the crystal quality low. Crystals diffracted extremely weakly and disintegrated during the data collection. Multiple attempts were made to grow better diffracting crystals, however, all this creates serious problems when mounted, as the crystal structure is sensitive to oxygen in the air and the loss of solvent molecules makes the crystal highly unstable. This resulted in weak diffraction and disorder in the solvent atom positions. In addition, due to the high degree of disorder in the benzene ring molecules in the ligand, and the obvious disorder of -CH<sub>3</sub> at the end, the atomic movement and refinement are unstable. These factors resulted in high  $wR_2$  value. We tried using commands to remove dead pixels at high angles and using "ISOR" to constrain highly disordered atoms. But it did not reduce the value of  $wR_2$ . Therefore, we believe that the main reason may be due to the poor quality of the crystal itself.

[1] Sheldrick, G. M. *Acta Crystallogr., Sect. C: Struct. Chem.* **2015**, *71*, 3-8.

### **The synthesis method.**

**Synthesis of cluster 1:** A mixture of 2-amino-6-methoxybenzoic acid (0.1 mmol, 16.7 mg), salicylaldehyde (0.1 mmol, 12.2 mg) and  $\text{Dy}(\text{NO}_3)_3 \cdot 6\text{H}_2\text{O}$  (0.2 mmol, 90 mg) and triethylamine (30  $\mu\text{L}$ ) were dissolved in mixed solvent ( $\text{CH}_3\text{OH} : \text{CH}_3\text{CN} = 1.2 : 0.8$ ) in a Pyrex tube. The tube was sealed and heated at 80 °C in an oven for 2 days, yellow crystals were observed with a yield of about 44.6% (based on  $\text{Dy}(\text{NO}_3)_3 \cdot 6\text{H}_2\text{O}$ ). Elemental analysis theoretical value ( $\text{C}_{96}\text{H}_{102}\text{Dy}_5\text{N}_{11}\text{O}_{47}$ ): C, 38.77%; H, 3.46%; N, 5.18%; experimental value: C, 38.65%; H, 3.31%; N, 5.01%. Infrared spectrum data (IR, KBr pellet,  $\text{cm}^{-1}$ ): 3444(m), 1593(s), 1462(m), 1391(m), 1264(m), 1066(m), 755(w), 582(w).

**Synthesis of cluster 2:** The procedure was similar to that of cluster 1, except that salicylaldehyde is replaced by 2-hydroxy-6-methoxy-benzaldehyde. The yield is about 40.5% (calculated with the amount of  $\text{Dy}(\text{NO}_3)_3 \cdot 6\text{H}_2\text{O}$ ). Elemental analysis theoretical value ( $\text{C}_{110}\text{H}_{108}\text{Dy}_8\text{N}_{16}\text{O}_{53}$ ): C, 34.75%; H, 2.86%; N, 5.89%; experimental value: C, 34.33%; H, 2.71%; N, 5.62%. Infrared spectrum data (IR, KBr pellet,  $\text{cm}^{-1}$ ): 3409(s), 1603(s), 1456(s), 1386(s), 1071(m), 960 (m), 728(m), 597(w).

**Synthesis of cluster 3:** The procedure was similar to that of cluster 1, except that  $\text{Dy}(\text{NO}_3)_3 \cdot 6\text{H}_2\text{O}$  is replaced by  $\text{Dy}(\text{OAc})_3 \cdot 4\text{H}_2\text{O}$ . The yield is about 39.6% (calculated with the amount of  $\text{Dy}(\text{OAc})_3 \cdot 4\text{H}_2\text{O}$ ). Elemental analysis theoretical value ( $\text{C}_{215}\text{H}_{305}\text{Dy}_{14}\text{N}_{31}\text{O}_{122}$ ): C, 34.2%; H, 4.07%; N, 5.75%; experimental value: C, 33.91%; H, 3.89%; N, 5.59%. Infrared spectrum data (IR, KBr pellet,  $\text{cm}^{-1}$ ): 3424(s), 1588(s), 1436(s), 1224(w), 1067(m), 951(w), 679(m).

**Synthesis of cluster 4:** The procedure was similar to that of cluster 1. A mixture of 2-amino-6-methoxybenzoic acid (0.1 mmol, 16.7 mg), salicylaldehyde (0.1 mmol, 12.2 mg) and  $\text{Gd}(\text{NO}_3)_3 \cdot 6\text{H}_2\text{O}$  (0.2 mmol, 91 mg) and triethylamine (30  $\mu\text{L}$ ) were dissolved in mixed solvent ( $\text{CH}_3\text{OH} : \text{CH}_3\text{CN} = 1.2 : 0.8$ ) in a Pyrex tube. The tube was sealed and heated at 80 °C in an oven for 2 days, yellow crystals were observed with a yield of about 41.1% (calculated with the amount of  $\text{Gd}(\text{NO}_3)_3 \cdot 6\text{H}_2\text{O}$ ). The yield is about 32.6% (calculated with the amount of  $\text{Gd}(\text{NO}_3)_3 \cdot 6\text{H}_2\text{O}$ ). Elemental analysis theoretical value ( $\text{C}_{96}\text{H}_{102}\text{Gd}_5\text{N}_{11}\text{O}_{47}$ ): C, 39.11%; H, 3.49%; N, 5.23%;

experimental value: C, 38.92%; H, 3.38%; N, 5.08%. Infrared spectrum data (IR, KBr pellet,  $\text{cm}^{-1}$ ): 3425(s), 1592(s), 1388(s), 1268(m), 1059(m), 1066(m), 755(w), 593(w).

**Synthesis of cluster 5:** The procedure was similar to that of cluster 2. A mixture of 2-amino-6-methoxybenzoic acid (0.1 mmol, 16.7 mg), 2-hydroxy-6-methoxy-benzaldehyde (0.1 mmol, 15.4 mg) and  $\text{Gd}(\text{NO}_3)_3 \cdot 6\text{H}_2\text{O}$  (0.2 mmol, 91 mg) and triethylamine (30  $\mu\text{L}$ ) were dissolved in mixed solvent ( $\text{CH}_3\text{OH} : \text{CH}_3\text{CN} = 1.2 : 0.8$ ) in a Pyrex tube. The yield is about 37.3% (calculated with the amount of  $\text{Gd}(\text{NO}_3)_3 \cdot 6\text{H}_2\text{O}$ ). The yield is about 35.1% (calculated with the amount of  $\text{Gd}(\text{NO}_3)_3 \cdot 6\text{H}_2\text{O}$ ). Elemental analysis theoretical value ( $\text{C}_{110}\text{H}_{108}\text{Gd}_8\text{N}_{16}\text{O}_{53}$ ): C, 35.13%; H, 2.89%; N, 5.96%; experimental value: C, 34.89%; H, 2.75%; N, 5.79%. Infrared spectrum data (IR, KBr pellet,  $\text{cm}^{-1}$ ): 3425(s), 1614(s), 1463(m), 1379(s), 1295(w), 1069(m), 739(w), 596(w).

Clusters 1–5 are all formed by the coordination of similar metal ions and organic ligands, so they have similar FTIR absorption peaks (Figure S3). The test results show that the broad absorption peak around  $3400 \text{ cm}^{-1}$  in the IR spectrum can be attributed to the stretching vibration of  $\nu(\text{HO-H})$  in the  $\text{H}_2\text{O}$ . The strong peak around  $1590 \text{ cm}^{-1}$  can be attributed to the C=N stretching vibration of the imine group. The strong peak around  $1440 \text{ cm}^{-1}$  can be attributed to the C=N and C=C stretching vibrations in the aromatic ring. The moderate-intensity absorption peak around  $1100 \text{ cm}^{-1}$  can be attributed to the stretching vibration between alcoholic hydroxyl groups C–O. The thermal stability test of clusters 1–5 was carried out under a flowing nitrogen atmosphere, and the temperature was slowly increased from  $35 \text{ }^\circ\text{C}$  to  $1000 \text{ }^\circ\text{C}$  at a rate of  $3 \text{ }^\circ\text{C min}^{-1}$ . Before  $84.5 \text{ }^\circ\text{C}$ , the weight loss rate of cluster 1 was 2.86%. This corresponds to the loss of five free  $\text{H}_2\text{O}$  (theoretical value is 3.0%). As the temperature continued to rise to  $202 \text{ }^\circ\text{C}$ , the weight loss rate of cluster 1 was 3.14%. This corresponds to the loss of five free molecule of  $\text{H}_2\text{O}$  (theoretical value is 3.12%) (Figure S4A). As the temperature continued to rise, cluster 1 was decomposed. Cluster 2 has a weight loss rate of 8.3% before  $170 \text{ }^\circ\text{C}$ , which corresponds to the loss of six free  $\text{CH}_3\text{CN}$  guest molecules, one free  $\text{H}_2\text{O}$ , and two terminally coordinated  $\text{H}_2\text{O}$  (theoretical value is 7.9%). As the temperature continues to rise, cluster 2 is decomposed (Figure S4B). Cluster 3 had a weight loss of 13% before  $168 \text{ }^\circ\text{C}$ , which corresponds to the loss of 10 free  $\text{CH}_3\text{CN}$  and 31 free  $\text{H}_2\text{O}$  (theoretical value is 12.8%). Cluster 3 was decomposed as the temperature continued to rise to  $340 \text{ }^\circ\text{C}$  (Figure

S4C). Before 86 °C, the weight loss rate of cluster **4** was 5.0%. This corresponds to the loss of eight free H<sub>2</sub>O (theoretical value is 4.9%). As the temperature continued to rise to 230 °C, the weight loss rate of cluster **4** was 5.3%. This corresponds to the loss of two free molecule of H<sub>2</sub>O and two free CH<sub>3</sub>CN (theoretical value is 4.2%) (Figure S4D). As the temperature continued to rise, cluster **4** was decomposed. Cluster **5** has a weight loss rate of 10.3% before 195 °C, which corresponds to the loss of six free CH<sub>3</sub>CN guest molecules, one free H<sub>2</sub>O, two terminally coordinated H<sub>2</sub>O, and one terminally coordinated NO<sub>3</sub><sup>-</sup> (theoretical value is 9.6%). As the temperature continues to rise, cluster **5** is decomposed (Figure S4E). In addition, the PXRD experimental values of clusters **1–5** are compared with the theoretical values (Figure S5), and the results show that they are all pure phases.



**Table S1.** Crystallographic data of clusters **1–3**.

|                                                                 | <b>1</b>                                                                         | <b>2</b>                                                                          |
|-----------------------------------------------------------------|----------------------------------------------------------------------------------|-----------------------------------------------------------------------------------|
| Formula                                                         | C <sub>96</sub> H <sub>102</sub> Dy <sub>5</sub> N <sub>11</sub> O <sub>47</sub> | C <sub>110</sub> H <sub>108</sub> Dy <sub>8</sub> N <sub>16</sub> O <sub>54</sub> |
| Formula weight                                                  | 2974.3830                                                                        | 3802.1106                                                                         |
| <i>T</i> , K                                                    | 100                                                                              | 100                                                                               |
| Crystal system                                                  | triclinic                                                                        | monoclinic                                                                        |
| Space group                                                     | <i>P</i> <sup>-</sup> 1                                                          | <i>P</i> 2 <sub>1</sub> / <i>c</i>                                                |
| <i>a</i> , Å                                                    | 16.3885(3)                                                                       | 13.39968(10)                                                                      |
| <i>b</i> , Å                                                    | 16.4444(4)                                                                       | 27.4462(2)                                                                        |
| <i>c</i> , Å                                                    | 20.8387(5)                                                                       | 16.60706(10)                                                                      |
| <i>α</i> , °                                                    | 101.263(7)                                                                       | 90                                                                                |
| <i>β</i> , °                                                    | 98.069(7)                                                                        | 93.4290(10)                                                                       |
| <i>γ</i> , °                                                    | 97.087(8)                                                                        | 90                                                                                |
| <i>V</i> , Å <sup>3</sup>                                       | 5387.2(2)                                                                        | 6096.66(9)                                                                        |
| <i>Z</i>                                                        | 2                                                                                | 2                                                                                 |
| <i>D</i> <sub>c</sub> , g cm <sup>-3</sup>                      | 1.697                                                                            | 1.927                                                                             |
| <i>μ</i> , mm <sup>-1</sup>                                     | 18.933                                                                           | 26.51                                                                             |
| <i>F</i> (000)                                                  | 2678                                                                             | 3380                                                                              |
| 2 <i>θ</i> range for data collection/°                          | 5.514, 140.15                                                                    | 6.228, 151.46                                                                     |
| Reflns coll.                                                    | 61467                                                                            | 56707                                                                             |
| Unique reflns                                                   | 20117                                                                            | 12123                                                                             |
| <i>R</i> <sub>int</sub>                                         | 0.040                                                                            | 0.0366                                                                            |
| Observed data [ <i>I</i> > 2σ( <i>I</i> )]                      | 20117                                                                            | 11624                                                                             |
| <i>N</i> <sub>par</sub> , <i>N</i> <sub>ref</sub>               | 1330, 20117                                                                      | 842, 12123                                                                        |
| <i>R</i> <sub>1</sub> <sup>a</sup> ( <i>I</i> > 2σ( <i>I</i> )) | 0.0429                                                                           | 0.0344                                                                            |
| <i>wR</i> <sub>2</sub> <sup>b</sup> (all data)                  | 0.1154                                                                           | 0.0866                                                                            |
| GOF                                                             | 1.044                                                                            | 1.067                                                                             |

<sup>a</sup>*R*<sub>1</sub> = Σ||*F*<sub>o</sub>| - |*F*<sub>c</sub>|| / Σ|*F*<sub>o</sub>|, <sup>b</sup>*wR*<sub>2</sub> = [Σ*w*(*F*<sub>o</sub><sup>2</sup> - *F*<sub>c</sub><sup>2</sup>)<sup>2</sup> / Σ*w*(*F*<sub>o</sub><sup>2</sup>)<sup>2</sup>]<sup>1/2</sup>

  

|                           | <b>3a</b>                                                                           | <b>3</b>                                                                            |
|---------------------------|-------------------------------------------------------------------------------------|-------------------------------------------------------------------------------------|
| Formula                   | C <sub>224</sub> H <sub>227</sub> Dy <sub>14</sub> N <sub>27</sub> O <sub>107</sub> | C <sub>215</sub> H <sub>305</sub> Dy <sub>14</sub> N <sub>31</sub> O <sub>122</sub> |
| Formula weight            | 7284.2773                                                                           | 7550.8579                                                                           |
| <i>T</i> , K              | 100                                                                                 | 100                                                                                 |
| Crystal system            | monoclinic                                                                          | monoclinic                                                                          |
| Space group               | <i>P</i> 2 <sub>1</sub> / <i>n</i>                                                  | <i>P</i> 2 <sub>1</sub> / <i>n</i>                                                  |
| <i>a</i> , Å              | 26.3873(3)                                                                          | 26.3873(3)                                                                          |
| <i>b</i> , Å              | 27.8871(5)                                                                          | 27.8871(5)                                                                          |
| <i>c</i> , Å              | 38.2827(5)                                                                          | 38.2827(5)                                                                          |
| <i>α</i> , °              | 90                                                                                  | 90                                                                                  |
| <i>β</i> , °              | 92.092(1)                                                                           | 92.092(1)                                                                           |
| <i>γ</i> , °              | 90                                                                                  | 90                                                                                  |
| <i>V</i> , Å <sup>3</sup> | 28152.1(7)                                                                          | 28152.1(7)                                                                          |

|                                               |                |                |
|-----------------------------------------------|----------------|----------------|
| $Z$                                           | 4              | 4              |
| $D_c, \text{g cm}^{-3}$                       | 1.421          | 1.782          |
| $\mu, \text{mm}^{-1}$                         | 19.586         | 19.75          |
| $F(000)$                                      | 11536          | 14848          |
| $2\theta$ range for data collection/ $^\circ$ | 4.016, 120.398 | 4.016, 120.398 |
| Reflns coll.                                  | 290267         | 290267         |
| Unique reflns                                 | 62206          | 62206          |
| $R_{\text{int}}$                              | 0.298          | 0.2983         |
| Observed data [ $I > 2\sigma(I)$ ]            | 41408          | 41408          |
| $N_{\text{par}}, N_{\text{ref}}$              | 2532, 62206    | 2764, 62206    |
| $R_1^a$ ( $I > 2\sigma(I)$ )                  | 0.1883         | 0.1815         |
| $wR_2^b$ (all data)                           | 0.4809         | 0.4694         |
| GOF                                           | 1.743          | 1.695          |

$$^a R_1 = \frac{\sum ||F_o| - |F_c||}{\sum |F_o|}, \quad ^b wR_2 = \left[ \frac{\sum w(F_o^2 - F_c^2)^2}{\sum w(F_o^2)^2} \right]^{1/2}$$

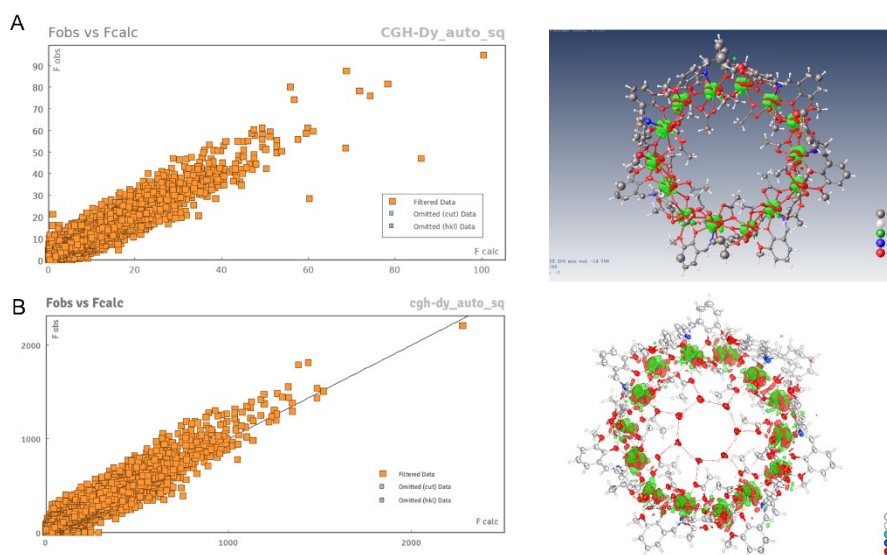

**Figure S1.** Comparison of data between the first refinement (A) and the second refinement (B).

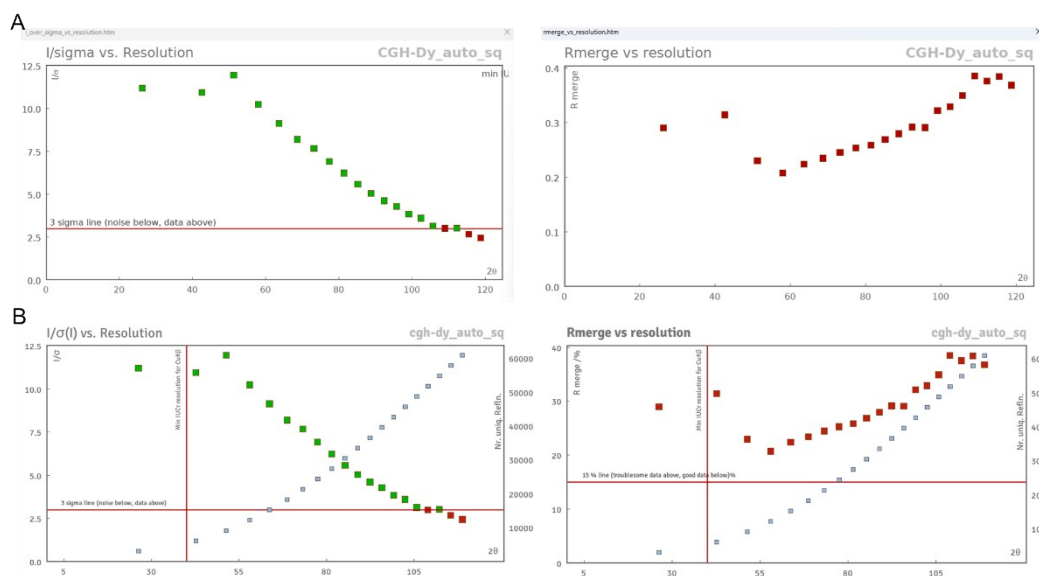

**Figure S2.** Comparison of data between the first refinement (A) and the second refinement (B).

**Refinement of 3a (first refinement):** The Solvent Mask routine of the OLEX2 software was implemented to remove the contributions of one disordered solvent to the observed structure factors. Used the SHEL 999 0.84 command to truncate some high-angle points. Atomic displacement parameter limitation commands such as ISOR, SIMU, and DELU are used in refinement. The large reported density is a result of using EADP restraints to model the positional disorder. But the overall quality of the data was poor due to the highly sensitive and unstable nature of the compound that rendered the crystal quality low.

**Refinement of 3 (second refinement):** Building on the first refinement, some minimal attempts were made to get the most out of the structural model. Specifically, seven highly correlated water molecules that were missed by solvent masking using “Use Solvent Mask results” were modeled, and non-hydrogen atoms were anisotropically manipulated. The ligand shows a high degree of disorder. C077~C07S, O46A~O46, C9~C07R, C2~C235, CXG~CXF, C8~CXE, C69A~C69, C07G~C07F, O51A~O51, C7~C082, N5A~N5, C0~C059, C5~C06W, C07X~C07W, C4~C04W, C3~C03X, C64~C1, O60~O60A, and O64~O64A were disordered over two sites with occupancies 0.516:0.484. In addition, limitation commands such as ISOR, SIMU, SADI, DFIX, and RIGU are used in refinement. But the overall quality of the data was poor due to the highly sensitive and unstable nature of the compound that rendered the crystal quality low.

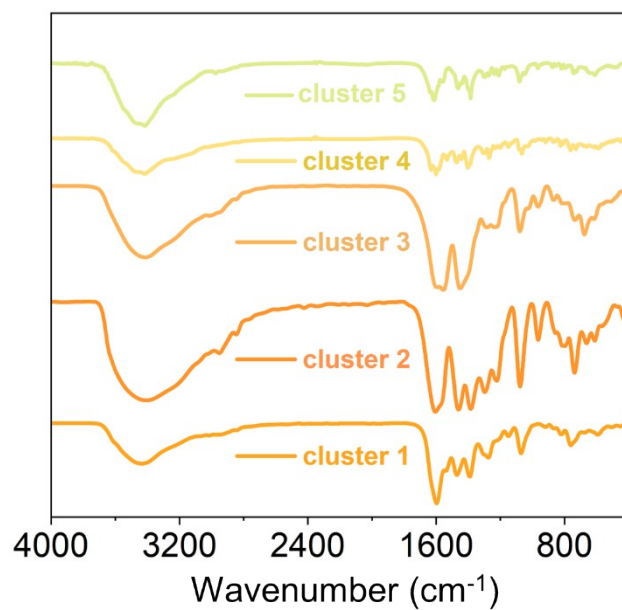

Figure S3. IR spectra of clusters 1–5.

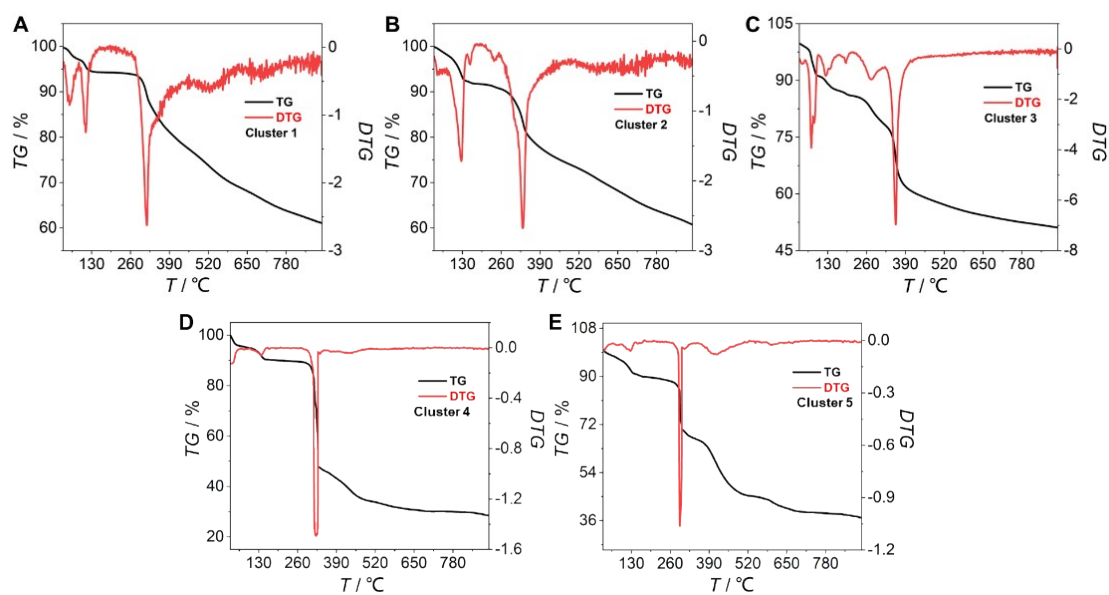

Figure S4. Thermogravimetric curves of clusters 1–5.

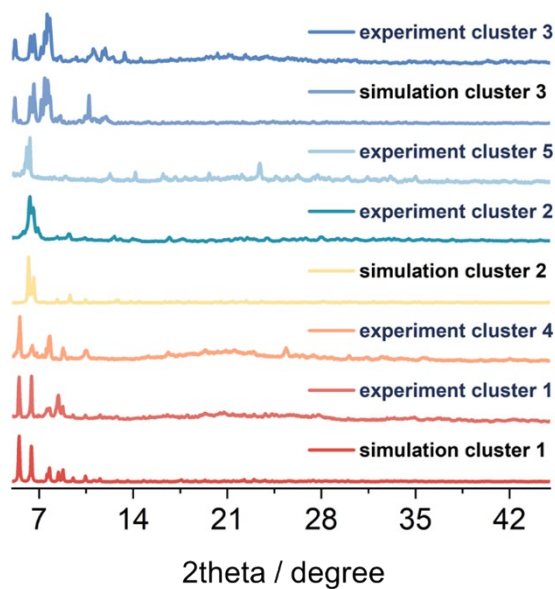

**Figure S5.** Powder X-ray diffraction patterns (PXRD) of clusters 1–5.

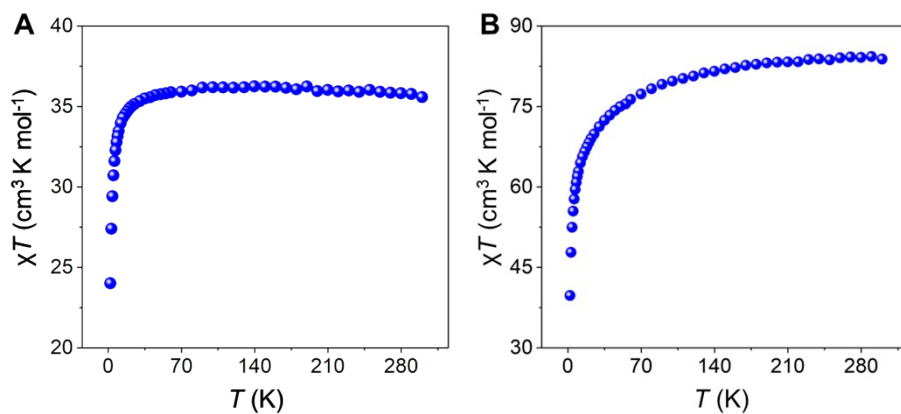

**Figure S6.** Temperature dependence of  $\chi_m T$  for clusters 4 and 5 (A and B).

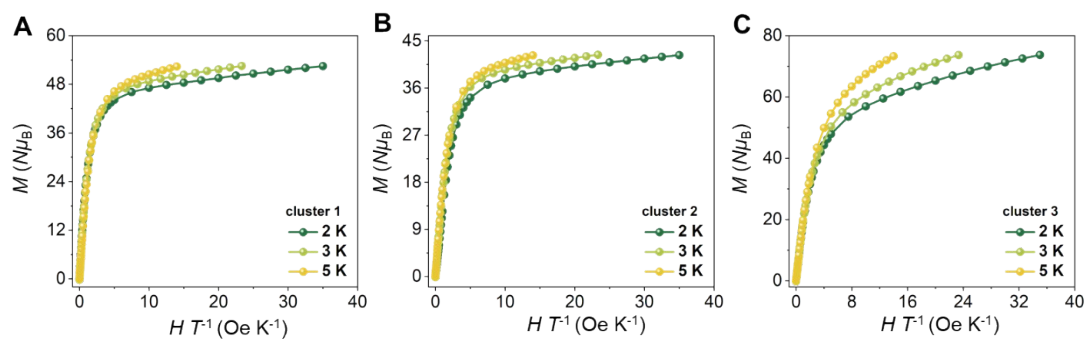

**Figure S7.**  $M$  vs.  $H/T$  plots of clusters 1–3 (A–C).

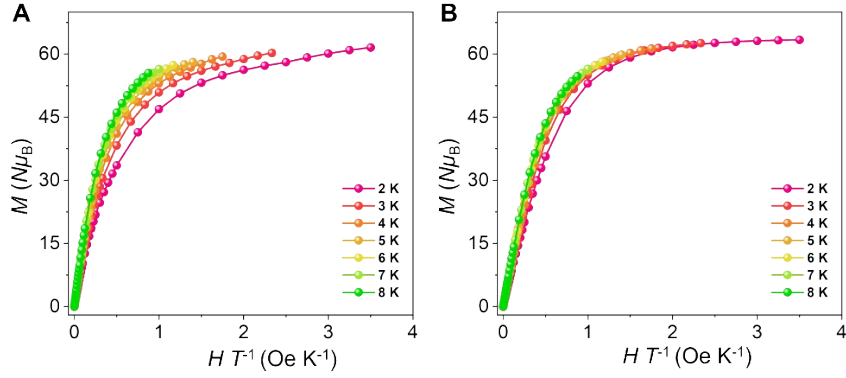

**Figure S8.**  $M$  vs.  $H/T$  plots of clusters 4 and 5 (A and B).

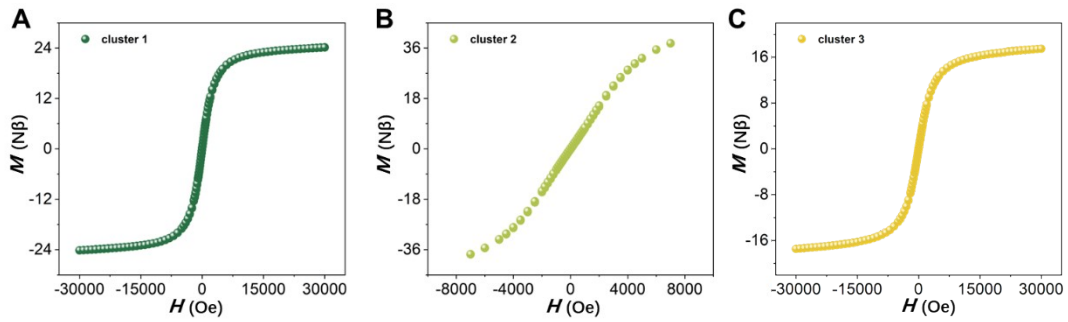

**Figure S9.** Loop curve graph of clusters 1–3 at 2 K.

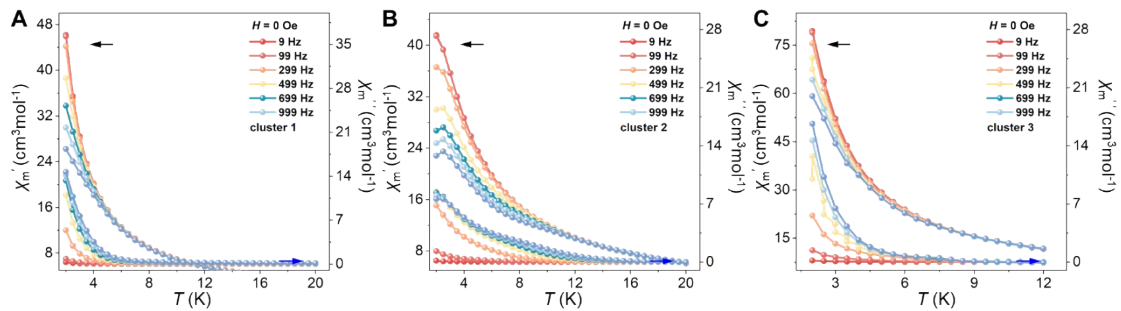

**Figure S10.** Temperature dependence of the real ( $\chi'$ ) and imaginary ( $\chi''$ ) ac susceptibilities at different frequencies in the 0 Oe dc fields for clusters 1–3.

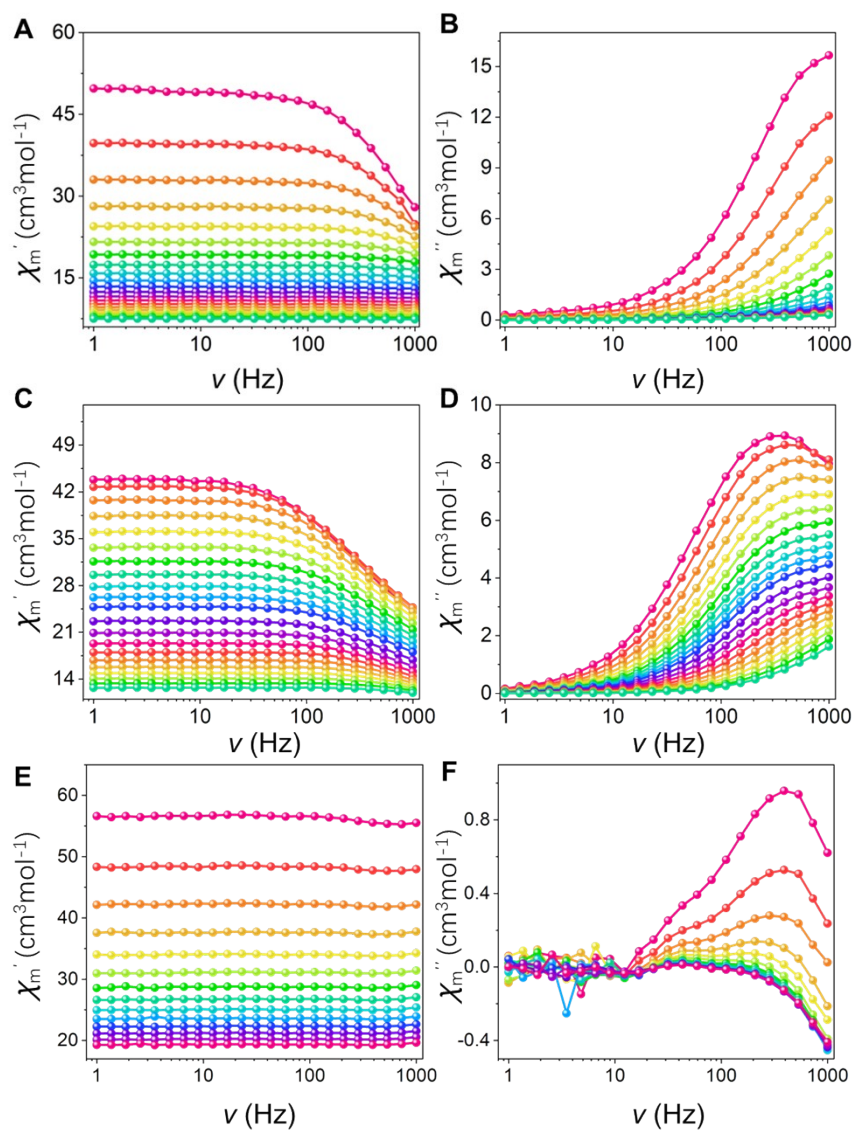

**Figure S11.** Frequency-dependent  $\chi'$  and  $\chi''$  curves under zero fields for clusters 1–3.

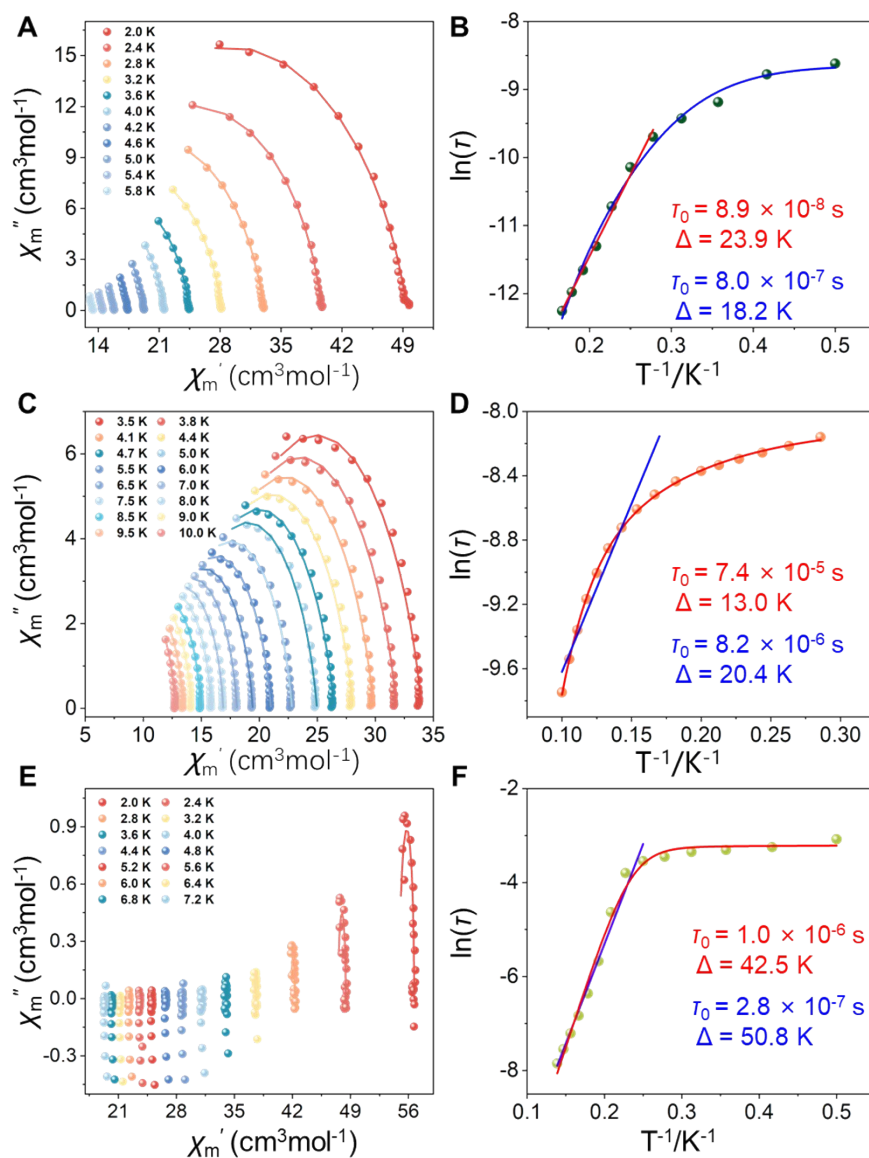

**Figure S12.** Energy barrier fits under 0 Oe dc field for clusters 1–3.

**Table S2.** Selected bond lengths (Å) and angles (°) of clusters 1–3.

| Bond lengths for cluster 1 (Å) |          |         |          |         |          |
|--------------------------------|----------|---------|----------|---------|----------|
| Dy1-O3                         | 2.316(3) | Dy2-O6  | 2.320(3) | Dy4-O15 | 2.531(3) |
| Dy1-O37                        | 2.467(3) | Dy2-O1  | 2.203(3) | Dy4-O14 | 2.527(3) |
| Dy1-O8                         | 2.220(3) | Dy3-O15 | 2.310(3) | Dy4-O18 | 2.524(3) |
| Dy1-O16                        | 2.345(3) | Dy3-O11 | 2.344(3) | Dy4-O2  | 2.426(3) |
| Dy1-O7                         | 2.513(3) | Dy3-O16 | 2.297(3) | Dy4-O19 | 2.506(3) |
| Dy1-O26                        | 2.332(3) | Dy3-O12 | 2.263(3) | Dy4-O7  | 2.446(3) |
| Dy1-O10                        | 2.389(3) | Dy3-O28 | 2.470(4) | Dy5-O23 | 2.371(3) |
| Dy1-N1                         | 2.536(4) | Dy3-O26 | 2.380(3) | Dy5-O19 | 2.315(3) |



|         |          |         |          |         |          |
|---------|----------|---------|----------|---------|----------|
| Dy2-O2  | 2.548(3) | Dy3-O27 | 2.413(3) | Dy5-O24 | 2.273(3) |
| Dy2-O20 | 2.339(3) | Dy3-N4  | 2.494(4) | Dy5-O20 | 2.290(3) |
| Dy2-O25 | 2.340(3) | Dy4-O26 | 2.411(3) | Dy5-O25 | 2.360(3) |
| Dy2-N2  | 2.506(4) | Dy4-O25 | 2.411(3) | Dy5-O33 | 2.462(3) |
| Dy2-O22 | 2.369(3) | Dy4-O30 | 2.444(3) | Dy5-O34 | 2.427(3) |
| Dy2-O36 | 2.464(3) | Dy4-O31 | 2.464(3) | Dy5-N6  | 2.485(4) |

---

**Bond angles for cluster 1 (°)**

---

|             |            |             |            |             |            |
|-------------|------------|-------------|------------|-------------|------------|
| O10-Dy1-N1  | 124.94(12) | O25-Dy2-O2  | 63.70(10)  | O26-Dy4-O18 | 68.91(10)  |
| O10-Dy1-O37 | 71.23(11)  | O25-Dy2-N2  | 133.15(12) | O31-Dy4-O15 | 72.49(11)  |
| O10-Dy1-O7  | 140.60(11) | N2-Dy2-O2   | 70.49(11)  | O31-Dy4-O14 | 71.75(11)  |
| O26-Dy1-O37 | 72.02(11)  | O27-Dy3-N4  | 133.88(12) | O31-Dy4-O18 | 112.64(11) |
| O26-Dy1-O16 | 74.59(11)  | O27-Dy3-O28 | 52.48(12)  | O31-Dy4-O19 | 77.90(11)  |
| O26-Dy1-O7  | 63.42(10)  | O15-Dy3-O11 | 143.26(11) | O7-Dy4-O15  | 71.51(10)  |
| O26-Dy1-O10 | 87.14(11)  | O15-Dy3-O28 | 75.94(12)  | O7-Dy4-O14  | 71.56(11)  |
| O26-Dy1-N1  | 133.11(12) | O15-Dy3-O26 | 70.32(11)  | O7-Dy4-O18  | 104.71(10) |
| O7-Dy1-N1   | 71.09(12)  | O15-Dy3-O27 | 89.32(12)  | O7-Dy4-O19  | 140.74(10) |
| O16-Dy1-O37 | 132.59(11) | O15-Dy3-N4  | 71.42(12)  | O7-Dy4-O31  | 139.54(11) |
| O16-Dy1-O7  | 72.86(11)  | O11-Dy3-O28 | 117.90(11) | O19-Dy4-O15 | 147.42(10) |
| O16-Dy1-O10 | 74.45(11)  | O11-Dy3-O26 | 75.50(11)  | O19-Dy4-O14 | 130.09(11) |
| O16-Dy1-N1  | 82.05(12)  | O11-Dy3-O27 | 76.92(12)  | O19-Dy4-O18 | 51.21(10)  |
| O8-Dy1-O3   | 84.42(12)  | O11-Dy3-N4  | 140.61(12) | O2-Dy4-O15  | 139.61(10) |
| O8-Dy1-O37  | 83.04(12)  | O16-Dy3-O15 | 105.86(11) | O2-Dy4-O14  | 104.75(10) |
| O8-Dy1-O16  | 120.19(12) | O16-Dy3-O11 | 76.92(11)  | O2-Dy4-O18  | 71.00(10)  |
| O8-Dy1-O7   | 138.76(11) | O16-Dy3-O28 | 153.52(11) | O2-Dy4-O19  | 72.62(10)  |
| O8-Dy1-O26  | 153.99(12) | O16-Dy3-O26 | 74.56(10)  | O2-Dy4-O7   | 69.78(10)  |
| O8-Dy1-O10  | 77.72(12)  | O16-Dy3-O27 | 151.91(12) | O2-Dy4-O31  | 136.84(11) |
| O8-Dy1-N1   | 72.51(13)  | O16-Dy3-N4  | 74.06(12)  | O2-Dy4-O30  | 140.81(11) |
| O37-Dy1-O7  | 118.23(11) | O12-Dy3-O15 | 142.82(12) | O18-Dy4-O15 | 131.00(10) |
| O37-Dy1-N1  | 145.03(12) | O12-Dy3-O11 | 72.83(12)  | O18-Dy4-O14 | 175.31(10) |
| O3-Dy1-O7   | 71.67(11)  | O12-Dy3-O16 | 88.42(12)  | O14-Dy4-O15 | 51.11(10)  |
| O3-Dy1-O26  | 94.30(11)  | O12-Dy3-O28 | 76.62(13)  | O34-Dy5-O33 | 52.64(12)  |
| O3-Dy1-O10  | 140.14(11) | O12-Dy3-O26 | 146.70(12) | O34-Dy5-N6  | 134.63(12) |
| O3-Dy1-N1   | 81.44(12)  | O12-Dy3-O27 | 93.48(13)  | O33-Dy5-N6  | 82.46(13)  |
| O3-Dy1-O16  | 144.09(11) | O12-Dy3-N4  | 80.28(12)  | O25-Dy5-O23 | 76.10(11)  |

|             |            |             |            |             |            |
|-------------|------------|-------------|------------|-------------|------------|
| O3-Dy1-O37  | 71.44(11)  | O28-Dy3-N4  | 81.88(12)  | O25-Dy5-O33 | 127.77(12) |
| O6-Dy2-O22  | 140.31(11) | O26-Dy3-O28 | 128.65(11) | O25-Dy5-O34 | 87.43(12)  |
| O6-Dy2-O36  | 72.26(11)  | O26-Dy3-O27 | 89.15(11)  | O25-Dy5-N6  | 121.58(12) |
| O6-Dy2-O2   | 70.41(10)  | O26-Dy3-N4  | 120.35(11) | O20-Dy5-O23 | 76.48(11)  |
| O6-Dy2-O20  | 143.31(11) | O30-Dy4-O15 | 76.61(11)  | O20-Dy5-O19 | 106.88(11) |
| O6-Dy2-O25  | 92.73(11)  | O30-Dy4-O14 | 112.70(11) | O20-Dy5-O25 | 75.97(11)  |
| O6-Dy2-N2   | 80.56(12)  | O30-Dy4-O18 | 71.87(11)  | O20-Dy5-O33 | 153.53(12) |
| O1-Dy2-O6   | 81.18(12)  | O30-Dy4-O19 | 74.65(11)  | O20-Dy5-O34 | 151.48(11) |
| O1-Dy2-O22  | 78.69(12)  | O30-Dy4-O7  | 132.72(11) | O20-Dy5-N6  | 73.72(12)  |
| O1-Dy2-O36  | 81.38(11)  | O30-Dy4-O31 | 52.24(12)  | O24-Dy5-O23 | 71.61(12)  |
| O1-Dy2-O2   | 136.47(11) | O25-Dy4-O15 | 117.12(11) | O24-Dy5-O19 | 143.22(11) |
| O1-Dy2-O20  | 124.29(12) | O25-Dy4-O14 | 68.18(10)  | O24-Dy5-O20 | 88.29(12)  |
| O1-Dy2-O25  | 152.18(12) | O25-Dy4-O18 | 110.86(11) | O24-Dy5-O25 | 146.60(11) |
| O1-Dy2-N2   | 72.88(13)  | O25-Dy4-O2  | 64.62(11)  | O24-Dy5-O33 | 76.24(12)  |
| O22-Dy2-O36 | 71.15(11)  | O25-Dy4-O19 | 66.22(10)  | O24-Dy5-O34 | 93.45(13)  |
| O22-Dy2-O2  | 142.72(10) | O25-Dy4-O7  | 106.11(10) | O24-Dy5-N6  | 80.20(13)  |
| O22-Dy2-N2  | 124.39(12) | O25-Dy4-O31 | 74.98(11)  | O19-Dy5-O23 | 143.79(11) |
| O36-Dy2-O2  | 118.17(10) | O25-Dy4-O30 | 119.34(11) | O19-Dy5-O25 | 70.16(11)  |
| O36-Dy2-N2  | 145.00(12) | O26-Dy4-O7  | 63.37(10)  | O19-Dy5-O33 | 75.97(12)  |
| O20-Dy2-O22 | 75.23(11)  | O26-Dy4-O31 | 116.40(11) | O19-Dy5-O34 | 88.46(12)  |
| O20-Dy2-O36 | 131.87(11) | O26-Dy4-O25 | 168.15(10) | O19-Dy5-N6  | 72.70(12)  |
| O20-Dy2-O2  | 73.25(10)  | O26-Dy4-O30 | 72.23(11)  | O23-Dy5-O34 | 77.10(11)  |
| O20-Dy2-O25 | 75.43(11)  | O26-Dy4-O2  | 105.12(10) | O23-Dy5-N6  | 139.18(12) |
| O20-Dy2-N2  | 82.87(12)  | O26-Dy4-O19 | 117.79(10) | O23-Dy5-O33 | 117.27(12) |
| O25-Dy2-O22 | 89.53(11)  | O26-Dy4-O15 | 66.22(10)  |             |            |
| O25-Dy2-O36 | 70.94(11)  | O26-Dy4-O14 | 111.02(10) |             |            |

---

**Bond lengths for cluster 2 (Å)**

---

|                     |          |                      |          |                       |          |
|---------------------|----------|----------------------|----------|-----------------------|----------|
| Dy1-O7              | 2.646(3) | Dy2-O22              | 2.400(3) | Dy3 <sup>i</sup> -O12 | 2.531(3) |
| Dy1-O16             | 2.295(3) | Dy2-O23              | 2.526(3) | Dy3 <sup>i</sup> -O11 | 2.490(3) |
| Dy1-O6              | 2.332(3) | Dy2-O24              | 2.505(3) | Dy4 <sup>i</sup> -O17 | 2.405(3) |
| Dy1-O14             | 2.486(3) | Dy2-O5               | 2.532(3) | Dy3-O19               | 2.494(3) |
| Dy1-O9 <sup>i</sup> | 2.339(3) | Dy2-N3               | 2.514(4) | Dy3-O18               | 2.434(3) |
| Dy1-O15             | 2.261(3) | Dy3-O16              | 2.277(3) | Dy4-O6                | 2.325(3) |
| Dy1-O13             | 2.387(3) | Dy3-O12 <sup>i</sup> | 2.531(3) | Dy4-O4                | 2.314(3) |

|                       |          |                      |          |                      |          |
|-----------------------|----------|----------------------|----------|----------------------|----------|
| Dy1-O22               | 2.323(3) | Dy3-O8 <sup>i</sup>  | 2.893(3) | Dy4-O8               | 2.310(3) |
| Dy1 <sup>i</sup> -O9  | 2.339(3) | Dy3-O17              | 2.302(3) | Dy4-O17 <sup>i</sup> | 2.405(3) |
| Dy2 <sup>i</sup> -O17 | 2.367(3) | Dy3-O15              | 2.259(3) | Dy4-O3               | 2.271(3) |
| Dy2-O4                | 2.353(3) | Dy3-O11 <sup>i</sup> | 2.490(3) | Dy4-O22              | 2.360(3) |
| Dy2-O12               | 2.299(3) | Dy3-O20              | 2.489(3) | Dy4-N1               | 2.526(4) |
| Dy2-O17 <sup>i</sup>  | 2.367(3) | Dy3 <sup>i</sup> -O8 | 2.893(3) | Dy4-N2               | 2.537(4) |
| Dy2-O13               | 2.343(3) |                      |          |                      |          |

---

**Bond angles for cluster 2 (°)**

---

|                          |            |                           |            |                                       |            |
|--------------------------|------------|---------------------------|------------|---------------------------------------|------------|
| O16-Dy1-O7               | 121.86(10) | O17 <sup>i</sup> -Dy2-N3  | 151.38(11) | O11 <sup>i</sup> -Dy3-O8 <sup>i</sup> | 146.96(9)  |
| O16-Dy1-O6               | 82.85(10)  | O13-Dy2-O4                | 74.40(10)  | O11 <sup>i</sup> -Dy3-O19             | 68.12(10)  |
| O16-Dy1-O14              | 150.79(10) | O13-Dy2-O17 <sup>i</sup>  | 125.35(10) | O20-Dy3-O12 <sup>i</sup>              | 75.43(10)  |
| O16-Dy1-O9 <sup>i</sup>  | 87.80(10)  | O17 <sup>i</sup> -Dy2-O24 | 67.96(10)  | O20-Dy3-O8 <sup>i</sup>               | 132.10(9)  |
| O16-Dy1-O13              | 148.18(10) | O17 <sup>i</sup> -Dy2-O5  | 125.11(10) | O20-Dy3-O11 <sup>i</sup>              | 79.95(10)  |
| O16-Dy1-O22              | 82.04(10)  | O13-Dy2-O22               | 66.00(10)  | O20-Dy3-O19                           | 51.42(10)  |
| O6-Dy1-O7                | 62.56(9)   | O13-Dy2-O23               | 129.48(10) | O12 <sup>i</sup> -Dy3-O8 <sup>i</sup> | 111.83(9)  |
| O6-Dy1-O14               | 123.38(10) | O13-Dy2-O24               | 140.44(10) | O19-Dy3-O8 <sup>i</sup>               | 134.51(10) |
| O6-Dy1-O9 <sup>i</sup>   | 145.98(10) | O13-Dy2-O5                | 69.49(10)  | O18-Dy3-O12 <sup>i</sup>              | 139.26(10) |
| O6-Dy1-O13               | 90.23(10)  | O13-Dy2-N3                | 68.63(11)  | O18-Dy3-O8 <sup>i</sup>               | 67.18(10)  |
| O14-Dy1-O7               | 69.06(10)  | O22-Dy2-O23               | 156.87(10) | O18-Dy3-O11 <sup>i</sup>              | 139.76(10) |
| O9 <sup>i</sup> -Dy1-O7  | 145.57(10) | O22-Dy2-O24               | 131.82(10) | O18-Dy3-O20                           | 77.58(11)  |
| O9 <sup>i</sup> -Dy1-O14 | 76.58(10)  | O22-Dy2-O5                | 126.07(10) | O18-Dy3-O19                           | 71.75(11)  |
| O9 <sup>i</sup> -Dy1-O13 | 80.74(10)  | O22-Dy2-N3                | 107.51(10) | O19-Dy3-O12 <sup>i</sup>              | 111.85(10) |
| O15-Dy1-O7               | 85.61(10)  | O23-Dy2-O5                | 76.95(10)  | O6-Dy4-O17 <sup>i</sup>               | 131.46(10) |
| O15-Dy1-O16              | 71.08(10)  | O24-Dy2-O23               | 50.65(10)  | O6-Dy4-O22                            | 68.80(10)  |
| O15-Dy1-O6               | 118.43(11) | O24-Dy2-O5                | 73.42(10)  | O6-Dy4-N1                             | 70.95(11)  |
| O15-Dy1-O14              | 83.87(10)  | O24-Dy2-N3                | 119.41(11) | O6-Dy4-N2                             | 83.40(11)  |
| O15-Dy1-O9 <sup>i</sup>  | 88.72(11)  | N3-Dy2-O23                | 70.34(11)  | O4-Dy4-O6                             | 84.15(10)  |
| O15-Dy1-O13              | 137.51(10) | N3-Dy2-O5                 | 82.14(11)  | O4-Dy4-O17 <sup>i</sup>               | 69.81(10)  |
| O15-Dy1-O22              | 150.05(10) | O16-Dy3-O12 <sup>i</sup>  | 72.83(9)   | O4-Dy4-O22                            | 76.26(10)  |
| O13-Dy1-O7               | 80.79(10)  | O16-Dy3-O8 <sup>i</sup>   | 69.30(9)   | O4-Dy4-N1                             | 141.42(11) |
| O13-Dy1-O14              | 53.67(10)  | O16-Dy3-O17               | 103.90(10) | O4-Dy4-N2                             | 72.26(11)  |
| O22-Dy1-O7               | 120.70(9)  | O16-Dy3-O11 <sup>i</sup>  | 78.41(10)  | O8-Dy4-O6                             | 110.03(10) |
| O22-Dy1-O6               | 69.31(10)  | O16-Dy3-O20               | 147.17(10) | O8-Dy4-O4                             | 142.69(10) |
| O22-Dy1-O14              | 117.26(10) | O16-Dy3-O19               | 137.03(10) | O8-Dy4-O17 <sup>i</sup>               | 75.49(10)  |

|                           |            |                                        |            |                          |            |
|---------------------------|------------|----------------------------------------|------------|--------------------------|------------|
| O22-Dy1-O9 <sup>i</sup>   | 77.05(10)  | O16-Dy3-O18                            | 133.65(11) | O8-Dy4-O22               | 77.34(10)  |
| O22-Dy1-O13               | 66.53(10)  | O17-Dy3-O12 <sup>i</sup>               | 70.84(9)   | O8-Dy4-N1                | 75.10(11)  |
| O4-Dy2-O17 <sup>i</sup>   | 69.81(10)  | O17-Dy3-O8 <sup>i</sup>                | 66.40(9)   | O8-Dy4-N2                | 141.51(11) |
| O4-Dy2-O22                | 74.76(10)  | O17-Dy3-O11 <sup>i</sup>               | 130.74(10) | O17 <sup>i</sup> -Dy4-N1 | 148.24(11) |
| O4-Dy2-O23                | 123.19(10) | O17-Dy3-O20                            | 72.80(10)  | O17 <sup>i</sup> -Dy4-N2 | 123.09(11) |
| O4-Dy2-O24                | 78.02(10)  | O17-Dy3-O19                            | 118.18(10) | O3-Dy4-O6                | 150.90(11) |
| O4-Dy2-O5                 | 65.12(10)  | O17-Dy3-O18                            | 72.36(11)  | O3-Dy4-O4                | 103.65(11) |
| O12-Dy2-O4                | 141.50(10) | O15-Dy3-O16                            | 71.43(10)  | O3-Dy4-O8                | 80.85(11)  |
| O12-Dy2-O17 <sup>i</sup>  | 73.95(10)  | O15-Dy3-O12 <sup>i</sup>               | 136.19(10) | O3-Dy4-O17 <sup>i</sup>  | 76.82(10)  |
| O12-Dy2-O13               | 119.04(10) | O15-Dy3-O8 <sup>i</sup>                | 77.77(10)  | O3-Dy4-O22               | 140.14(11) |
| O12-Dy2-O22               | 78.91(10)  | O15-Dy3-O17                            | 142.59(11) | O3-Dy4-N1                | 86.90(11)  |
| O12-Dy2-O23               | 78.17(10)  | O15-Dy3-O11 <sup>i</sup>               | 85.66(10)  | O3-Dy4-N2                | 72.80(12)  |
| O12-Dy2-O24               | 100.19(10) | O15-Dy3-O20                            | 130.95(10) | O22-Dy4-O17 <sup>i</sup> | 65.65(10)  |
| O12-Dy2-O5                | 151.96(10) | O15-Dy3-O19                            | 79.67(10)  | O22-Dy4-N1               | 118.44(10) |
| O12-Dy2-N3                | 77.46(11)  | O15-Dy3-O18                            | 84.45(11)  | O22-Dy4-N2               | 139.69(11) |
| O17 <sup>i</sup> -Dy2-O22 | 65.61(9)   | O11 <sup>i</sup> -Dy3-O12 <sup>i</sup> | 62.90(9)   | N1-Dy4-N2                | 75.92(11)  |
| O17 <sup>i</sup> -Dy2-O23 | 104.69(10) |                                        |            |                          |            |

---

**Bond lengths for cluster 3 (Å)**

---

|          |           |          |           |          |           |
|----------|-----------|----------|-----------|----------|-----------|
| Dy1-O4   | 2.721(15) | Dy5-O65  | 2.473(16) | Dy10-O34 | 2.518(16) |
| Dy1-O3   | 2.288(16) | Dy6-O62  | 2.398(15) | Dy10-O28 | 2.240(16) |
| Dy1-O5   | 2.395(14) | Dy6-O54  | 2.361(17) | Dy10-O36 | 2.446(16) |
| Dy1-O84  | 2.367(15) | Dy6-O63  | 2.353(18) | Dy10-O37 | 2.488(17) |
| Dy1-O86  | 2.376(14) | Dy6-O61  | 2.461(15) | Dy10-O29 | 2.441(15) |
| Dy1-O85  | 2.441(15) | Dy6-O59  | 2.530(17) | Dy10-O38 | 2.416(17) |
| Dy1-O1   | 2.263(14) | Dy6-O58  | 2.451(16) | Dy10-O32 | 2.479(17) |
| Dy1-O87  | 2.377(16) | Dy6-O60  | 2.51(4)   | Dy11-O31 | 2.419(17) |
| Dy1-N1   | 2.596(17) | Dy6-O57  | 2.330(16) | Dy11-O30 | 2.701(15) |
| Dy2-O81  | 2.438(14) | Dy6-O55A | 2.444(18) | Dy11-O24 | 2.361(16) |
| Dy2-O00Q | 2.514(15) | Dy6-O60A | 2.46(4)   | Dy11-O25 | 2.452(15) |
| Dy2-O84  | 2.472(16) | Dy7-O49  | 2.328(15) | Dy11-O26 | 2.416(16) |
| Dy2-O80  | 2.306(17) | Dy7-O50  | 2.482(18) | Dy11-O27 | 2.353(17) |
| Dy2-O82  | 2.521(15) | Dy7-O54  | 2.791(17) | Dy11-O29 | 2.278(14) |
| Dy2-O85  | 2.386(17) | Dy7-O52  | 2.396(16) | Dy11-O22 | 2.337(15) |
| Dy2-O87  | 2.329(14) | Dy7-O53  | 2.388(14) | Dy11-N3  | 2.58(2)   |

|          |           |          |           |          |           |
|----------|-----------|----------|-----------|----------|-----------|
| Dy2-O83  | 2.371(14) | Dy7-O56  | 2.292(16) | Dy12-O16 | 2.419(15) |
| Dy2-O77  | 2.364(14) | Dy7-O51  | 2.18(3)   | Dy12-O17 | 2.365(17) |
| Dy3-O72  | 2.353(15) | Dy7-N5   | 2.52(3)   | Dy12-O24 | 2.418(14) |
| Dy3-O81  | 2.300(14) | Dy7-O55A | 2.296(18) | Dy12-O20 | 2.442(16) |
| Dy3-O79  | 2.361(17) | Dy7-N5A  | 2.57(3)   | Dy12-O25 | 2.391(15) |
| Dy3-O76  | 2.369(17) | Dy7-O51A | 2.39(3)   | Dy12-O23 | 2.439(15) |
| Dy3-O73  | 2.355(17) | Dy8-O45  | 2.489(16) | Dy12-O21 | 2.558(17) |
| Dy3-O023 | 2.467(14) | Dy8-O51  | 2.44(3)   | Dy12-O15 | 2.299(14) |
| Dy3-O78  | 2.434(16) | Dy8-O48  | 2.366(17) | Dy12-O22 | 2.356(16) |
| Dy3-O77  | 2.820(15) | Dy8-O46  | 2.53(3)   | Dy13-O9  | 2.285(14) |
| Dy3-N7   | 2.579(19) | Dy8-O51A | 2.26(3)   | Dy13-O12 | 2.500(16) |
| Dy4-O72  | 2.459(15) | Dy8-O46A | 2.51(3)   | Dy13-O16 | 2.290(16) |
| Dy4-O69  | 2.419(16) | Dy8-O49  | 2.505(18) | Dy13-O17 | 2.795(14) |
| Dy4-O71  | 2.412(16) | Dy8-O50  | 2.394(16) | Dy13-O13 | 2.347(15) |
| Dy4-O73  | 2.344(15) | Dy8-O41  | 2.359(14) | Dy13-O11 | 2.376(16) |
| Dy4-O70  | 2.503(16) | Dy8-O43  | 2.291(17) | Dy13-O18 | 2.411(14) |
| Dy4-O023 | 2.416(18) | Dy8-O44  | 2.482(18) | Dy13-O14 | 2.331(15) |
| Dy4-O66  | 2.355(17) | Dy9-O42  | 2.290(15) | Dy13-N2  | 2.550(19) |
| Dy4-O68  | 2.270(16) | Dy9-O38  | 2.469(15) | Dy14-O4  | 2.368(15) |
| Dy4-O74  | 2.529(18) | Dy9-O40  | 2.453(17) | Dy14-O3  | 2.427(15) |
| Dy5-O02N | 2.406(17) | Dy9-N4   | 2.588(19) | Dy14-O12 | 2.391(14) |
| Dy5-O67  | 2.284(18) | Dy9-O41  | 2.750(18) | Dy14-O10 | 2.449(14) |
| Dy5-N6   | 2.60(2)   | Dy9-O37  | 2.373(15) | Dy14-O2  | 2.296(15) |
| Dy5-O63  | 2.298(14) | Dy9-O44  | 2.253(16) | Dy14-O8  | 2.520(14) |
| Dy5-O66  | 2.681(14) | Dy9-O35  | 2.327(18) | Dy14-O6  | 2.487(14) |
| Dy5-O61  | 2.401(16) | Dy9-O39  | 2.443(16) | Dy14-O11 | 2.458(14) |
| Dy5-O62  | 2.472(18) | Dy10-O35 | 2.344(14) | Dy14-O9  | 2.377(17) |
| Dy5-O69  | 2.310(16) | Dy10-O30 | 2.353(15) |          |           |

---

**Bond angles for cluster 3 (°)**

---

|            |          |              |          |              |          |
|------------|----------|--------------|----------|--------------|----------|
| O3-Dy1-O4  | 64.5(5)  | O62-Dy6-O61  | 68.2(5)  | O40-Dy9-N4   | 136.4(6) |
| O3-Dy1-O5  | 82.4(5)  | O62-Dy6-O59  | 132.2(6) | N4-Dy9-O41   | 130.5(6) |
| O3-Dy1-O84 | 138.6(5) | O62-Dy6-O58  | 119.5(5) | O35-Dy10-O30 | 145.7(6) |
| O3-Dy1-O86 | 90.1(5)  | O62-Dy6-O60  | 81.0(9)  | O35-Dy10-O34 | 63.5(5)  |
| O3-Dy1-O85 | 139.7(5) | O62-Dy6-O55A | 73.0(5)  | O35-Dy10-O36 | 95.0(5)  |
| O3-Dy1-O87 | 140.3(5) | O62-Dy6-O60A | 87.2(8)  | O35-Dy10-O37 | 70.8(5)  |

|              |          |              |           |              |          |
|--------------|----------|--------------|-----------|--------------|----------|
| O3-Dy1-N1    | 70.0(6)  | O54-Dy6-O62  | 82.8(5)   | O35-Dy10-O29 | 117.6(5) |
| O5-Dy1-O4    | 49.1(4)  | O54-Dy6-O61  | 82.9(6)   | O35-Dy10-O38 | 68.8(5)  |
| O5-Dy1-O85   | 73.6(5)  | O54-Dy6-O59  | 144.2(5)  | O35-Dy10-O32 | 75.7(5)  |
| O5-Dy1-N1    | 140.9(6) | O54-Dy6-O58  | 85.7(6)   | O30-Dy10-O34 | 145.2(5) |
| O84-Dy1-O4   | 74.7(5)  | O54-Dy6-O60  | 122.7(11) | O30-Dy10-O36 | 83.6(5)  |
| O84-Dy1-O5   | 75.9(5)  | O54-Dy6-O55A | 68.2(5)   | O30-Dy10-O37 | 81.8(5)  |
| O84-Dy1-O86  | 117.7(5) | O54-Dy6-O60A | 117.1(10) | O30-Dy10-O29 | 66.5(5)  |
| O84-Dy1-O85  | 65.5(5)  | O63-Dy6-O62  | 68.4(6)   | O30-Dy10-O38 | 82.0(5)  |
| O84-Dy1-O87  | 71.7(5)  | O63-Dy6-O54  | 145.7(5)  | O30-Dy10-O32 | 119.4(5) |
| O84-Dy1-N1   | 142.5(6) | O63-Dy6-O61  | 69.7(5)   | O28-Dy10-O35 | 134.5(6) |
| O86-Dy1-O4   | 120.6(5) | O63-Dy6-O59  | 64.5(5)   | O28-Dy10-O30 | 79.4(6)  |
| O86-Dy1-O5   | 76.4(5)  | O63-Dy6-O58  | 92.4(6)   | O28-Dy10-O34 | 72.5(5)  |
| O86-Dy1-O85  | 53.4(5)  | O63-Dy6-O60  | 72.0(10)  | O28-Dy10-O36 | 82.4(6)  |
| O86-Dy1-O87  | 94.3(5)  | O63-Dy6-O55A | 117.3(5)  | O28-Dy10-O37 | 132.7(6) |
| O86-Dy1-N1   | 76.5(5)  | O63-Dy6-O60A | 80.8(9)   | O28-Dy10-O29 | 78.4(6)  |
| O85-Dy1-O4   | 116.2(4) | O61-Dy6-O59  | 101.8(6)  | O28-Dy10-O38 | 149.6(5) |
| O85-Dy1-N1   | 110.6(5) | O61-Dy6-O60  | 137.4(9)  | O28-Dy10-O32 | 85.0(6)  |
| O1-Dy1-O4    | 77.7(5)  | O61-Dy6-O60A | 146.7(8)  | O36-Dy10-O34 | 72.9(5)  |
| O1-Dy1-O3    | 85.5(5)  | O58-Dy6-O61  | 51.4(5)   | O36-Dy10-O37 | 52.5(5)  |
| O1-Dy1-O5    | 125.3(5) | O58-Dy6-O59  | 71.0(5)   | O36-Dy10-O32 | 151.0(5) |
| O1-Dy1-O84   | 79.2(5)  | O58-Dy6-O60  | 148.4(11) | O37-Dy10-O34 | 102.4(5) |
| O1-Dy1-O86   | 156.8(5) | O58-Dy6-O60A | 148.0(9)  | O29-Dy10-O34 | 125.0(6) |
| O1-Dy1-O85   | 134.8(6) | O60-Dy6-O59  | 77.4(10)  | O29-Dy10-O36 | 146.9(5) |
| O1-Dy1-O87   | 75.3(5)  | O57-Dy6-O62  | 149.0(6)  | O29-Dy10-O37 | 131.0(6) |
| O1-Dy1-N1    | 80.6(5)  | O57-Dy6-O54  | 75.9(5)   | O29-Dy10-O32 | 53.0(5)  |
| O87-Dy1-O4   | 140.0(5) | O57-Dy6-O63  | 137.6(6)  | O38-Dy10-O34 | 131.8(5) |
| O87-Dy1-O5   | 137.0(5) | O57-Dy6-O61  | 129.6(5)  | O38-Dy10-O36 | 119.2(6) |
| O87-Dy1-O85  | 67.6(5)  | O57-Dy6-O59  | 74.0(6)   | O38-Dy10-O37 | 67.0(5)  |
| O87-Dy1-N1   | 72.7(6)  | O57-Dy6-O58  | 81.5(5)   | O38-Dy10-O29 | 72.1(5)  |
| N1-Dy1-O4    | 130.6(5) | O57-Dy6-O60  | 91.7(9)   | O38-Dy10-O32 | 83.5(6)  |
| O81-Dy2-O00Q | 126.5(5) | O57-Dy6-O55A | 78.3(6)   | O32-Dy10-O34 | 78.5(5)  |
| O81-Dy2-O84  | 129.9(5) | O57-Dy6-O60A | 82.9(8)   | O32-Dy10-O37 | 141.4(5) |
| O81-Dy2-O82  | 51.9(5)  | O55A-Dy6-O61 | 133.9(5)  | O31-Dy11-O30 | 49.3(5)  |
| O00Q-Dy2-O82 | 80.5(5)  | O55A-Dy6-O59 | 122.9(5)  | O31-Dy11-O25 | 75.4(5)  |

|              |          |               |           |              |          |
|--------------|----------|---------------|-----------|--------------|----------|
| O84-Dy2-O00Q | 101.6(5) | O55A-Dy6-O58  | 150.1(6)  | O31-Dy11-N3  | 139.3(6) |
| O84-Dy2-O82  | 140.3(5) | O55A-Dy6-O60  | 54.5(11)  | O24-Dy11-O31 | 78.2(5)  |
| O80-Dy2-O81  | 81.0(5)  | O55A-Dy6-O60A | 49.6(10)  | O24-Dy11-O30 | 77.5(5)  |
| O80-Dy2-O00Q | 72.8(5)  | O60A-Dy6-O59  | 77.8(10)  | O24-Dy11-O25 | 66.6(5)  |
| O80-Dy2-O84  | 131.8(5) | O49-Dy7-O50   | 66.0(6)   | O24-Dy11-O26 | 118.4(5) |
| O80-Dy2-O82  | 87.1(5)  | O49-Dy7-O54   | 74.6(5)   | O24-Dy11-N3  | 141.5(6) |
| O80-Dy2-O85  | 150.9(5) | O49-Dy7-O52   | 117.1(6)  | O25-Dy11-O30 | 119.0(5) |
| O80-Dy2-O87  | 134.7(5) | O49-Dy7-O53   | 76.3(5)   | O25-Dy11-N3  | 108.2(6) |
| O80-Dy2-O83  | 81.5(5)  | O49-Dy7-N5    | 144.7(7)  | O26-Dy11-O31 | 76.5(6)  |
| O80-Dy2-O77  | 78.4(6)  | O49-Dy7-N5A   | 144.1(7)  | O26-Dy11-O30 | 120.3(5) |
| O85-Dy2-O81  | 71.9(5)  | O49-Dy7-O51A  | 74.2(8)   | O26-Dy11-O25 | 53.0(5)  |
| O85-Dy2-O00Q | 132.5(5) | O50-Dy7-O54   | 118.9(5)  | O26-Dy11-N3  | 74.9(6)  |
| O85-Dy2-O84  | 64.8(5)  | O50-Dy7-N5    | 113.9(11) | O27-Dy11-O31 | 125.0(5) |
| O85-Dy2-O82  | 84.4(5)  | O50-Dy7-N5A   | 105.7(10) | O27-Dy11-O30 | 76.7(5)  |
| O87-Dy2-O81  | 116.1(5) | O52-Dy7-O50   | 52.7(5)   | O27-Dy11-O24 | 80.8(6)  |
| O87-Dy2-O00Q | 63.4(5)  | O52-Dy7-O54   | 122.1(5)  | O27-Dy11-O25 | 137.5(5) |
| O87-Dy2-O84  | 70.7(5)  | O52-Dy7-N5    | 79.5(9)   | O27-Dy11-O26 | 155.4(6) |
| O87-Dy2-O82  | 75.4(5)  | O52-Dy7-N5A   | 72.4(9)   | O27-Dy11-N3  | 80.6(6)  |
| O87-Dy2-O85  | 69.3(5)  | O53-Dy7-O50   | 75.6(6)   | O29-Dy11-O31 | 81.0(6)  |
| O87-Dy2-O83  | 93.0(5)  | O53-Dy7-O54   | 50.2(5)   | O29-Dy11-O30 | 63.1(5)  |
| O87-Dy2-O77  | 146.3(6) | O53-Dy7-O52   | 76.4(5)   | O29-Dy11-O24 | 140.1(5) |
| O83-Dy2-O81  | 150.6(5) | O53-Dy7-N5    | 139.0(7)  | O29-Dy11-O25 | 138.6(6) |
| O83-Dy2-O00Q | 69.3(5)  | O53-Dy7-N5A   | 137.7(7)  | O29-Dy11-O26 | 88.7(5)  |
| O83-Dy2-O84  | 53.5(5)  | O53-Dy7-O51A  | 137.3(8)  | O29-Dy11-O27 | 83.9(5)  |
| O83-Dy2-O82  | 149.7(5) | O56-Dy7-O49   | 78.4(5)   | O29-Dy11-O22 | 139.5(6) |
| O83-Dy2-O85  | 118.1(5) | O56-Dy7-O50   | 134.1(6)  | O29-Dy11-N3  | 70.1(6)  |
| O77-Dy2-O81  | 68.2(5)  | O56-Dy7-O54   | 75.1(5)   | O22-Dy11-O31 | 138.8(5) |
| O77-Dy2-O00Q | 143.8(5) | O56-Dy7-O52   | 158.3(5)  | O22-Dy11-O30 | 141.9(5) |
| O77-Dy2-O84  | 81.5(5)  | O56-Dy7-O53   | 123.9(6)  | O22-Dy11-O24 | 71.4(6)  |
| O77-Dy2-O82  | 119.9(5) | O56-Dy7-N5    | 79.5(9)   | O22-Dy11-O25 | 67.4(5)  |
| O77-Dy2-O85  | 81.9(5)  | O56-Dy7-O55A  | 84.3(6)   | O22-Dy11-O26 | 94.0(5)  |
| O77-Dy2-O83  | 85.2(5)  | O56-Dy7-N5A   | 86.2(9)   | O22-Dy11-O27 | 77.1(5)  |
| O72-Dy3-O79  | 77.6(5)  | O56-Dy7-O51A  | 78.9(9)   | O22-Dy11-N3  | 71.7(6)  |
| O72-Dy3-O76  | 79.5(6)  | O51-Dy7-O49   | 73.5(9)   | N3-Dy11-O30  | 129.6(5) |

|              |          |               |           |              |          |
|--------------|----------|---------------|-----------|--------------|----------|
| O72-Dy3-O73  | 73.8(5)  | O51-Dy7-O50   | 71.4(9)   | O16-Dy12-O20 | 53.4(6)  |
| O72-Dy3-O023 | 66.6(5)  | O51-Dy7-O54   | 137.3(10) | O16-Dy12-O23 | 150.1(5) |
| O72-Dy3-O78  | 117.8(5) | O51-Dy7-O52   | 97.5(11)  | O16-Dy12-O21 | 123.1(5) |
| O72-Dy3-O77  | 78.7(5)  | O51-Dy7-O53   | 142.0(9)  | O17-Dy12-O16 | 68.1(5)  |
| O72-Dy3-N7   | 143.9(6) | O51-Dy7-O56   | 71.3(11)  | O17-Dy12-O24 | 82.4(5)  |
| O81-Dy3-O72  | 140.0(5) | O51-Dy7-N5    | 73.5(11)  | O17-Dy12-O20 | 121.4(5) |
| O81-Dy3-O79  | 83.4(5)  | O51-Dy7-O55A  | 136.2(8)  | O17-Dy12-O25 | 82.6(5)  |
| O81-Dy3-O76  | 82.2(5)  | N5-Dy7-O54    | 125.0(11) | O17-Dy12-O23 | 86.1(5)  |
| O81-Dy3-O73  | 134.5(6) | O55A-Dy7-O49  | 137.2(6)  | O17-Dy12-O21 | 145.5(5) |
| O81-Dy3-O023 | 141.8(6) | O55A-Dy7-O50  | 141.6(5)  | O24-Dy12-O16 | 132.5(5) |
| O81-Dy3-O78  | 90.6(5)  | O55A-Dy7-O54  | 63.1(5)   | O24-Dy12-O20 | 139.8(5) |
| O81-Dy3-O77  | 62.5(5)  | O55A-Dy7-O52  | 92.2(6)   | O24-Dy12-O23 | 53.2(5)  |
| O81-Dy3-N7   | 68.8(6)  | O55A-Dy7-O53  | 81.8(5)   | O24-Dy12-O21 | 102.4(5) |
| O79-Dy3-O76  | 123.2(5) | O55A-Dy7-N5   | 66.5(10)  | O20-Dy12-O21 | 76.5(5)  |
| O79-Dy3-O023 | 134.7(5) | O55A-Dy7-N5A  | 71.8(9)   | O25-Dy12-O16 | 73.1(5)  |
| O79-Dy3-O78  | 159.8(5) | O55A-Dy7-O51A | 139.9(7)  | O25-Dy12-O24 | 66.7(5)  |
| O79-Dy3-O77  | 75.7(5)  | N5A-Dy7-O54   | 132.3(10) | O25-Dy12-O20 | 83.7(5)  |
| O79-Dy3-N7   | 88.2(6)  | O51A-Dy7-O50  | 64.5(8)   | O25-Dy12-O23 | 119.8(5) |
| O76-Dy3-O023 | 77.4(5)  | O51A-Dy7-O54  | 142.6(9)  | O25-Dy12-O21 | 131.0(5) |
| O76-Dy3-O78  | 74.6(5)  | O51A-Dy7-O52  | 90.5(9)   | O23-Dy12-O20 | 147.4(6) |
| O76-Dy3-O77  | 49.1(5)  | O51A-Dy7-N5A  | 71.0(10)  | O23-Dy12-O21 | 71.0(5)  |
| O76-Dy3-N7   | 134.6(6) | O49-Dy8-O46   | 92.4(10)  | O15-Dy12-O16 | 78.2(5)  |
| O73-Dy3-O79  | 75.9(6)  | O49-Dy8-O46A  | 109.8(10) | O15-Dy12-O17 | 79.0(5)  |
| O73-Dy3-O76  | 142.7(5) | O50-Dy8-O49   | 64.7(5)   | O15-Dy12-O24 | 132.8(5) |
| O73-Dy3-O023 | 68.3(6)  | O50-Dy8-O44   | 73.0(6)   | O15-Dy12-O20 | 86.0(5)  |
| O73-Dy3-O78  | 95.3(5)  | O50-Dy8-O45   | 84.1(5)   | O15-Dy12-O25 | 150.1(5) |
| O73-Dy3-O77  | 143.9(5) | O50-Dy8-O51   | 68.8(7)   | O15-Dy12-O23 | 82.4(5)  |
| O73-Dy3-N7   | 70.5(6)  | O50-Dy8-O46   | 131.8(7)  | O15-Dy12-O21 | 72.7(5)  |
| O023-Dy3-O77 | 120.6(5) | O50-Dy8-O46A  | 133.4(7)  | O15-Dy12-O22 | 134.9(6) |
| O023-Dy3-N7  | 104.5(5) | O41-Dy8-O49   | 81.7(5)   | O22-Dy12-O16 | 116.7(5) |
| O78-Dy3-O023 | 53.1(5)  | O41-Dy8-O50   | 81.1(5)   | O22-Dy12-O17 | 145.7(5) |
| O78-Dy3-O77  | 118.4(5) | O41-Dy8-O44   | 67.5(5)   | O22-Dy12-O24 | 70.1(5)  |
| O78-Dy3-N7   | 71.7(6)  | O41-Dy8-O45   | 119.9(6)  | O22-Dy12-O20 | 74.0(5)  |
| N7-Dy3-O77   | 129.9(5) | O41-Dy8-O51   | 142.8(8)  | O22-Dy12-O25 | 68.1(6)  |



|              |          |              |           |              |          |
|--------------|----------|--------------|-----------|--------------|----------|
| O72-Dy4-O70  | 144.9(5) | O41-Dy8-O48  | 85.0(5)   | O22-Dy12-O23 | 93.0(5)  |
| O72-Dy4-O74  | 100.0(5) | O41-Dy8-O46  | 139.8(8)  | O22-Dy12-O21 | 63.5(5)  |
| O69-Dy4-O72  | 132.4(6) | O41-Dy8-O46A | 145.6(7)  | O9-Dy13-O12  | 67.8(5)  |
| O69-Dy4-O70  | 51.1(6)  | O43-Dy8-O49  | 132.7(5)  | O9-Dy13-O16  | 137.8(5) |
| O69-Dy4-O74  | 125.5(5) | O43-Dy8-O50  | 150.2(6)  | O9-Dy13-O17  | 142.7(5) |
| O71-Dy4-O72  | 51.7(6)  | O43-Dy8-O41  | 78.9(5)   | O9-Dy13-O13  | 95.7(5)  |
| O71-Dy4-O69  | 150.0(5) | O43-Dy8-O44  | 79.1(6)   | O9-Dy13-O11  | 71.9(5)  |
| O71-Dy4-O70  | 148.3(6) | O43-Dy8-O45  | 87.0(6)   | O9-Dy13-O18  | 139.5(6) |
| O71-Dy4-O023 | 117.0(5) | O43-Dy8-O51  | 136.9(7)  | O9-Dy13-O14  | 78.1(5)  |
| O71-Dy4-O74  | 70.9(5)  | O43-Dy8-O48  | 82.7(6)   | O9-Dy13-N2   | 72.3(6)  |
| O73-Dy4-O72  | 72.1(5)  | O43-Dy8-O46  | 76.3(8)   | O12-Dy13-O17 | 118.8(5) |
| O73-Dy4-O69  | 114.0(5) | O43-Dy8-O46A | 69.5(8)   | O12-Dy13-N2  | 107.5(5) |
| O73-Dy4-O71  | 95.7(5)  | O44-Dy8-O49  | 130.7(5)  | O16-Dy13-O12 | 140.6(5) |
| O73-Dy4-O70  | 76.3(5)  | O44-Dy8-O45  | 52.4(5)   | O16-Dy13-O17 | 62.7(5)  |
| O73-Dy4-O023 | 69.4(6)  | O44-Dy8-O46  | 135.9(10) | O16-Dy13-O13 | 89.7(6)  |
| O73-Dy4-O66  | 143.6(6) | O44-Dy8-O46A | 117.5(10) | O16-Dy13-O11 | 140.0(5) |
| O73-Dy4-O74  | 63.0(6)  | O45-Dy8-O49  | 139.5(5)  | O16-Dy13-O18 | 82.3(5)  |
| O70-Dy4-O74  | 78.4(6)  | O45-Dy8-O46  | 90.0(9)   | O16-Dy13-O14 | 81.9(5)  |
| O023-Dy4-O72 | 65.8(5)  | O45-Dy8-O46A | 72.8(9)   | O16-Dy13-N2  | 69.1(5)  |
| O023-Dy4-O69 | 72.7(5)  | O51-Dy8-O49  | 66.2(9)   | O13-Dy13-O12 | 53.4(5)  |
| O023-Dy4-O70 | 89.2(5)  | O51-Dy8-O44  | 120.3(10) | O13-Dy13-O17 | 118.0(4) |
| O023-Dy4-O74 | 132.4(5) | O51-Dy8-O45  | 79.2(10)  | O13-Dy13-O11 | 117.5(6) |
| O66-Dy4-O72  | 80.4(5)  | O51-Dy8-O46  | 63.1(9)   | O13-Dy13-O18 | 74.9(5)  |
| O66-Dy4-O69  | 68.8(5)  | O48-Dy8-O49  | 52.7(5)   | O13-Dy13-N2  | 74.5(6)  |
| O66-Dy4-O71  | 85.1(5)  | O48-Dy8-O50  | 117.2(6)  | O11-Dy13-O12 | 65.8(5)  |
| O66-Dy4-O70  | 119.6(5) | O48-Dy8-O44  | 149.4(5)  | O11-Dy13-O17 | 78.2(5)  |
| O66-Dy4-O023 | 77.9(6)  | O48-Dy8-O45  | 150.7(5)  | O11-Dy13-O18 | 77.8(5)  |
| O66-Dy4-O74  | 147.4(6) | O48-Dy8-O51  | 89.7(10)  | O11-Dy13-N2  | 143.1(5) |
| O68-Dy4-O72  | 130.2(5) | O48-Dy8-O46  | 60.9(9)   | O18-Dy13-O12 | 75.5(5)  |
| O68-Dy4-O69  | 80.5(6)  | O48-Dy8-O46A | 77.9(9)   | O18-Dy13-O17 | 48.7(5)  |
| O68-Dy4-O71  | 81.1(5)  | O51A-Dy8-O49 | 73.2(9)   | O18-Dy13-N2  | 137.6(5) |
| O68-Dy4-O73  | 135.4(6) | O51A-Dy8-O50 | 68.0(7)   | O14-Dy13-O12 | 137.5(5) |
| O68-Dy4-O70  | 83.6(5)  | O51A-Dy8-O41 | 146.2(8)  | O14-Dy13-O17 | 75.3(5)  |
| O68-Dy4-O023 | 150.3(6) | O51A-Dy8-O43 | 134.9(7)  | O14-Dy13-O13 | 158.7(5) |

|              |          |               |           |              |          |
|--------------|----------|---------------|-----------|--------------|----------|
| O68-Dy4-O66  | 80.8(6)  | O51A-Dy8-O44  | 113.3(10) | O14-Dy13-O11 | 80.3(5)  |
| O68-Dy4-O74  | 74.2(6)  | O51A-Dy8-O45  | 71.4(10)  | O14-Dy13-O18 | 122.8(5) |
| O62-Dy5-O65  | 72.2(5)  | O51A-Dy8-O48  | 97.0(10)  | O14-Dy13-N2  | 84.2(6)  |
| O62-Dy5-O66  | 117.9(5) | O51A-Dy8-O46A | 66.5(9)   | N2-Dy13-O17  | 129.5(5) |
| O62-Dy5-N6   | 106.6(6) | O35-Dy9-O39   | 93.9(6)   | O9-Dy14-O3   | 116.3(5) |
| O69-Dy5-O62  | 138.7(6) | O35-Dy9-O41   | 144.1(5)  | O9-Dy14-O12  | 68.3(5)  |
| O69-Dy5-O65  | 84.7(5)  | O35-Dy9-O37   | 73.1(6)   | O9-Dy14-O10  | 93.3(5)  |
| O69-Dy5-O66  | 64.9(5)  | O35-Dy9-O38   | 68.2(5)   | O9-Dy14-O6   | 75.7(5)  |
| O69-Dy5-O61  | 139.0(5) | O35-Dy9-O40   | 138.5(5)  | O9-Dy14-O11  | 68.9(5)  |
| O69-Dy5-O02N | 89.7(6)  | O35-Dy9-N4    | 72.0(6)   | O9-Dy14-O8   | 65.8(5)  |
| O69-Dy5-N6   | 69.6(6)  | O39-Dy9-O41   | 117.7(5)  | O4-Dy14-O9   | 145.2(5) |
| O65-Dy5-O66  | 51.0(6)  | O39-Dy9-O38   | 52.1(5)   | O4-Dy14-O3   | 68.5(5)  |
| O65-Dy5-N6   | 138.9(6) | O39-Dy9-O40   | 73.8(5)   | O4-Dy14-O12  | 82.1(5)  |
| O63-Dy5-O62  | 68.0(6)  | O39-Dy9-N4    | 73.8(6)   | O4-Dy14-O10  | 84.9(5)  |
| O63-Dy5-O69  | 139.2(6) | O37-Dy9-O39   | 118.7(5)  | O4-Dy14-O6   | 121.1(5) |
| O63-Dy5-O65  | 135.6(6) | O37-Dy9-O41   | 76.6(5)   | O4-Dy14-O11  | 82.9(5)  |
| O63-Dy5-O66  | 140.0(5) | O37-Dy9-O38   | 68.0(5)   | O4-Dy14-O8   | 143.8(5) |
| O63-Dy5-O61  | 71.6(5)  | O37-Dy9-O40   | 78.5(5)   | O3-Dy14-O10  | 150.1(5) |
| O63-Dy5-O02N | 94.3(5)  | O37-Dy9-N4    | 143.7(7)  | O3-Dy14-O6   | 52.9(5)  |
| O63-Dy5-N6   | 73.0(6)  | O44-Dy9-O35   | 137.1(6)  | O3-Dy14-O11  | 132.3(5) |
| O61-Dy5-O62  | 68.0(6)  | O44-Dy9-O39   | 89.9(6)   | O3-Dy14-O8   | 122.3(5) |
| O61-Dy5-O65  | 75.8(5)  | O44-Dy9-O41   | 64.2(5)   | O12-Dy14-O3  | 72.4(5)  |
| O61-Dy5-O66  | 74.9(5)  | O44-Dy9-O37   | 139.4(6)  | O12-Dy14-O10 | 118.6(5) |
| O61-Dy5-O02N | 118.8(6) | O44-Dy9-O42   | 82.2(6)   | O12-Dy14-O6  | 85.6(5)  |
| O61-Dy5-N6   | 143.4(5) | O44-Dy9-O38   | 139.4(6)  | O12-Dy14-O11 | 66.2(5)  |
| O02N-Dy5-O62 | 52.0(5)  | O44-Dy9-O40   | 83.4(6)   | O12-Dy14-O8  | 133.4(5) |
| O02N-Dy5-O65 | 75.7(5)  | O44-Dy9-N4    | 68.2(7)   | O10-Dy14-O6  | 148.0(5) |
| O02N-Dy5-O66 | 121.0(5) | O42-Dy9-O35   | 78.5(6)   | O10-Dy14-O11 | 52.7(5)  |
| O02N-Dy5-N6  | 72.8(6)  | O42-Dy9-O39   | 158.0(5)  | O10-Dy14-O8  | 72.3(5)  |
| O67-Dy5-O62  | 138.1(5) | O42-Dy9-O41   | 77.2(6)   | O6-Dy14-O8   | 75.8(5)  |
| O67-Dy5-O69  | 83.1(6)  | O42-Dy9-O37   | 79.2(5)   | O11-Dy14-O6  | 140.8(5) |
| O67-Dy5-O65  | 125.6(5) | O42-Dy9-O38   | 138.4(6)  | O11-Dy14-O8  | 103.5(5) |
| O67-Dy5-O63  | 77.1(6)  | O42-Dy9-O40   | 125.1(6)  | O2-Dy14-O9   | 135.9(5) |
| O67-Dy5-O66  | 76.0(5)  | O42-Dy9-N4    | 84.3(6)   | O2-Dy14-O4   | 78.4(5)  |

|              |          |             |          |             |          |
|--------------|----------|-------------|----------|-------------|----------|
| O67-Dy5-O61  | 79.8(6)  | O38-Dy9-O41 | 117.0(5) | O2-Dy14-O3  | 79.7(5)  |
| O67-Dy5-O02N | 156.4(6) | O38-Dy9-N4  | 107.3(6) | O2-Dy14-O12 | 150.4(5) |
| O67-Dy5-N6   | 83.6(6)  | O40-Dy9-O41 | 49.1(5)  | O2-Dy14-O10 | 81.7(5)  |
| N6-Dy5-O66   | 131.7(6) | O40-Dy9-O38 | 73.4(5)  | O2-Dy14-O6  | 85.7(5)  |
| O2-Dy14-O11  | 132.0(5) | O2-Dy14-O8  | 71.0(5)  |             |          |

**Table S3.** *SHAPE* analysis of the Dy(III) in cluster **1**.

| <b>Label</b> | <b>Symmetry</b> | <b>Shape</b>                                 | <b>Distortion (°)</b><br><b>Dy1</b> |
|--------------|-----------------|----------------------------------------------|-------------------------------------|
| OP-8         | $D_{8h}$        | Octagon                                      | 34.080                              |
| HPY-8        | $C_{7v}$        | Heptagonal pyramid                           | 22.253                              |
| HBPY-8       | $D_{6h}$        | Hexagonal bipyramid                          | 15.401                              |
| CU-8         | $O_h$           | Cube                                         | 10.239                              |
| SAPR-8       | $D_{4d}$        | Square antiprism                             | 2.132                               |
| TDD-8        | $D_{2d}$        | Triangular dodecahedron                      | 1.592                               |
| JGBF-8       | $D_{2d}$        | Johnson-Gyrobifastigium (J26)                | 14.485                              |
| JETBPY-8     | $D_{3h}$        | Johnson-Elongated triangular bipyramid (J14) | 28.082                              |
| JBTP-8       | $C_{2v}$        | Johnson-Biaugmented trigonal prism (J50)     | 2.848                               |
| BTPR-8       | $C_{2v}$        | Biaugmented trigonal prism                   | 2.240                               |
| JSD-8        | $D_{2d}$        | Snub disphenoid (J84)                        | 3.735                               |
| TT-8         | $T_d$           | Triakis tetrahedron                          | 10.546                              |
| ETBPY-8      | $D_{3h}$        | Elongated trigonal bipyramid                 | 24.144                              |
| <b>Label</b> | <b>Symmetry</b> | <b>Shape</b>                                 | <b>Distortion (°)</b><br><b>Dy2</b> |
| DP-10        | $D_{10h}$       | Decagon                                      | 46.126                              |
| EPY-10       | $C_{9v}$        | Enneagonal pyramid                           | 36.115                              |
| OBPY-10      | $D_{8h}$        | Octagonal bipyramid                          | 30.540                              |
| PPR-10       | $D_{5h}$        | Pentagonal prism                             | 26.826                              |
| PAPR-10      | $D_{5d}$        | Pentagonal antiprism                         | 25.825                              |
| JBCCU-10     | $D_{4h}$        | Bicapped cube J15                            | 27.505                              |
| JBCSAPR-10   | $D_{4d}$        | Bicapped square antiprism J17                | 22.863                              |
| JMBIC-10     | $C_{2v}$        | Metabidiminished icosahedron J62             | 22.745                              |
| JATDI-10     | $C_{3v}$        | Augmented tridiminished icosahedron J64      | 31.535                              |
| JSPC-10      | $C_{2v}$        | Sphenocorona J87                             | 20.196                              |
| SDD-10       | $D_2$           | Staggered Dodecahedron (2:6:2)               | 21.584                              |
| TD-10        | $C_{2v}$        | Tetradecahedron (2:6:2)                      | 20.788                              |
| HD-10        | $D_{4h}$        | Hexadecahedron (2:6:2) or (1:4:4:1)          | 25.446                              |
| <b>Label</b> | <b>Symmetry</b> | <b>Shape</b>                                 | <b>Distortion (°)</b><br><b>Dy4</b> |
| OP-8         | $D_{8h}$        | Octagon                                      | 29.897                              |
| HPY-8        | $C_{7v}$        | Heptagonal pyramid                           | 23.267                              |
| HBPY-8       | $D_{6h}$        | Hexagonal bipyramid                          | 13.706                              |

|          |          |                                              |        |
|----------|----------|----------------------------------------------|--------|
| CU-8     | $O_h$    | Cube                                         | 8.793  |
| SAPR-8   | $D_{4d}$ | Square antiprism                             | 1.458  |
| TDD-8    | $D_{2d}$ | Triangular dodecahedron                      | 1.752  |
| JGBF-8   | $D_{2d}$ | Johnson-Gyrobifastigium (J26)                | 12.022 |
| JETBPY-8 | $D_{3h}$ | Johnson-Elongated triangular bipyramid (J14) | 27.446 |
| JBTP-8   | $C_{2v}$ | Johnson-Biaugmented trigonal prism (J50)     | 1.465  |
| BTPR-8   | $C_{2v}$ | Biaugmen tedtrigonal prism                   | 1.057  |
| JSD-8    | $D_{2d}$ | Snub disphenoid (J84)                        | 3.829  |
| TT-8     | $T_d$    | Triakis tetrahedron                          | 9.608  |
| ETBPY-8  | $D_{3h}$ | Elongated trigonal bipyramid                 | 24.050 |

**Table S4.** *SHAPE* analysis of the Dy(III) in cluster **2**.

| <b>Label</b> | <b>Symmetry</b> | <b>Shape</b>                                 | <b>Distortion (°)</b><br><b>Dy1</b> |
|--------------|-----------------|----------------------------------------------|-------------------------------------|
| OP-8         | $D_{8h}$        | Octagon                                      | 34.465                              |
| HPY-8        | $C_{7v}$        | Heptagonal pyramid                           | 22.972                              |
| HBPY-8       | $D_{6h}$        | Hexagonal bipyramid                          | 14.701                              |
| CU-8         | $O_h$           | Cube                                         | 11.772                              |
| SAPR-8       | $D_{4d}$        | Square antiprism                             | 3.650                               |
| TDD-8        | $D_{2d}$        | Triangular dodecahedron                      | 2.820                               |
| JGBF-8       | $D_{2d}$        | Johnson-Gyrobifastigium (J26)                | 13.742                              |
| JETBPY-8     | $D_{3h}$        | Johnson-Elongated triangular bipyramid (J14) | 27.488                              |
| JBTP-8       | $C_{2v}$        | Johnson-Biaugmented trigonal prism (J50)     | 2.968                               |
| BTPR-8       | $C_{2v}$        | Biaugmen tedtrigonal prism                   | 1.857                               |
| JSD-8        | $D_{2d}$        | Snub disphenoid (J84)                        | 4.674                               |
| TT-8         | $T_d$           | Triakis tetrahedron                          | 12.132                              |
| ETBPY-8      | $D_{3h}$        | Elongated trigonal bipyramid                 | 23.801                              |
| <b>Label</b> | <b>Symmetry</b> | <b>Shape</b>                                 | <b>Distortion (°)</b><br><b>Dy2</b> |
| EP-9         | $D_{9h}$        | Enneagon                                     | 46.536                              |
| OPY-9        | $C_{8v}$        | Octagonal pyramid                            | 34.740                              |
| HBPY-9       | $D_{7h}$        | Heptagonal bipyramid                         | 31.628                              |
| JTC-9        | $C_{3v}$        | Triangular cupola J3                         | 26.164                              |
| JCCU-9       | $C_{4v}$        | Capped cube (J8)                             | 27.082                              |
| CCU-9        | $C_4$           | Capped cube                                  | 27.029                              |
| JCSAPR-9     | $C_{4v}$        | Capped sq. antiprism                         | 22.431                              |
| CSAPR-9      | $C_{4v}$        | Capped square antiprism                      | 22.257                              |
| JTCTPR-9     | $D_{3h}$        | Tricapped trigonal prism J51                 | 22.557                              |
| TCTPR-9      | $D_{3h}$        | Tricapped trigonal prism                     | 22.621                              |
| JTDIC-9      | $C_{3v}$        | Tridiminished icosahedron J63                | 28.655                              |
| HH-9         | $C_{2v}$        | Hula-hoop                                    | 26.356                              |
| MFF-9        | $C_s$           | Muffin                                       | 22.014                              |

| <b>Label</b> | <b>Symmetry</b> | <b>Shape</b>                                 | <b>Distortion (°)</b><br><b>Dy3</b> |
|--------------|-----------------|----------------------------------------------|-------------------------------------|
| OP-8         | $D_{8h}$        | Octagon                                      | 41.248                              |
| HPY-8        | $C_{7v}$        | Heptagonal pyramid                           | 34.938                              |
| HBPY-8       | $D_{6h}$        | Hexagonal bipyramid                          | 31.838                              |
| CU-8         | $O_h$           | Cube                                         | 29.750                              |
| SAPR-8       | $D_{4d}$        | Square antiprism                             | 24.122                              |
| TDD-8        | $D_{2d}$        | Triangular dodecahedron                      | 22.789                              |
| JGBF-8       | $D_{2d}$        | Johnson-Gyrobifastigium (J26)                | 29.793                              |
| JETBPY-8     | $D_{3h}$        | Johnson-Elongated triangular bipyramid (J14) | 39.459                              |
| JBTP-8       | $C_{2v}$        | Johnson-Biaugmented trigonal prism (J50)     | 21.273                              |
| BTPR-8       | $C_{2v}$        | Biaugmen tedtrigonal prism                   | 21.801                              |
| JSD-8        | $D_{2d}$        | Snub disphenoid (J84)                        | 21.185                              |
| TT-8         | $T_d$           | Triakis tetrahedron                          | 28.419                              |
| ETBPY-8      | $D_{3h}$        | Elongated trigonal bipyramid                 | 37.822                              |

  

| <b>Label</b> | <b>Symmetry</b> | <b>Shape</b>                                 | <b>Distortion (°)</b><br><b>Dy4</b> |
|--------------|-----------------|----------------------------------------------|-------------------------------------|
| OP-8         | $D_{8h}$        | Octagon                                      | 46.572                              |
| HPY-8        | $C_{7v}$        | Heptagonal pyramid                           | 34.998                              |
| HBPY-8       | $D_{6h}$        | Hexagonal bipyramid                          | 31.262                              |
| CU-8         | $O_h$           | Cube                                         | 29.563                              |
| SAPR-8       | $D_{4d}$        | Square antiprism                             | 24.153                              |
| TDD-8        | $D_{2d}$        | Triangular dodecahedron                      | 24.412                              |
| JGBF-8       | $D_{2d}$        | Johnson-Gyrobifastigium (J26)                | 32.056                              |
| JETBPY-8     | $D_{3h}$        | Johnson-Elongated triangular bipyramid (J14) | 39.388                              |
| JBTP-8       | $C_{2v}$        | Johnson-Biaugmented trigonal prism (J50)     | 23.417                              |
| BTPR-8       | $C_{2v}$        | Biaugmen tedtrigonal prism                   | 24.874                              |
| JSD-8        | $D_{2d}$        | Snub disphenoid (J84)                        | 23.475                              |
| TT-8         | $T_d$           | Triakis tetrahedron                          | 28.260                              |
| ETBPY-8      | $D_{3h}$        | Elongated trigonal bipyramid                 | 36.324                              |

**Table S5.** *SHAPE* analysis of the Dy(III) in cluster 3.

| <b>Label</b> | <b>Symmetry</b> | <b>Shape</b>                 | <b>Distortion (°)</b><br><b>Dy1</b> |
|--------------|-----------------|------------------------------|-------------------------------------|
| EP-9         | $D_{9h}$        | Enneagon                     | 43.082                              |
| OPY-9        | $C_{8v}$        | Octagonal pyramid            | 32.868                              |
| HBPY-9       | $D_{7h}$        | Heptagonal bipyramid         | 33.390                              |
| JTC-9        | $C_{3v}$        | Triangular cupola J3         | 22.000                              |
| JCCU-9       | $C_{4v}$        | Capped cube (J8)             | 27.110                              |
| CCU-9        | $C_4$           | Capped cube                  | 26.767                              |
| JCSAPR-9     | $C_{4v}$        | Capped sq. antiprism         | 22.628                              |
| CSAPR-9      | $C_{4v}$        | Capped square antiprism      | 22.144                              |
| JTCTPR-9     | $D_{3h}$        | Tricapped trigonal prism J51 | 21.810                              |

| TCTPR-9  | $D_{3h}$ | Tricapped trigonal prism      | 22.597                           |
|----------|----------|-------------------------------|----------------------------------|
| JTDIC-9  | $C_{3v}$ | Tridiminished icosahedron J63 | 28.559                           |
| HH-9     | $C_{2v}$ | Hula-hoop                     | 27.147                           |
| MFF-9    | $C_s$    | Muffin                        | 22.025                           |
| Label    | Symmetry | Shape                         | Distortion ( $^{\circ}$ )<br>Dy2 |
| EP-9     | $D_{9h}$ | Enneagon                      | 47.343                           |
| OPY-9    | $C_{8v}$ | Octagonal pyramid             | 40.127                           |
| HBPY-9   | $D_{7h}$ | Heptagonal bipyramid          | 34.360                           |
| JTC-9    | $C_{3v}$ | Triangular cupola J3          | 31.131                           |
| JCCU-9   | $C_{4v}$ | Capped cube (J8)              | 30.857                           |
| CCU-9    | $C_4$    | Capped cube                   | 29.668                           |
| JCSAPR-9 | $C_{4v}$ | Capped sq. antiprism          | 26.540                           |
| CSAPR-9  | $C_{4v}$ | Capped square antiprism       | 25.299                           |
| JTCTPR-9 | $D_{3h}$ | Tricapped trigonal prism J51  | 28.299                           |
| TCTPR-9  | $D_{3h}$ | Tricapped trigonal prism      | 25.961                           |
| JTDIC-9  | $C_{3v}$ | Tridiminished icosahedron J63 | 33.532                           |
| HH-9     | $C_{2v}$ | Hula-hoop                     | 28.400                           |
| MFF-9    | $C_s$    | Muffin                        | 25.092                           |

**Table 6.** The parameters XT, XS, alpha and tau.

| Cluster 1   |         |            |         |
|-------------|---------|------------|---------|
| ChiS        | ChiT    | Tau        | Alpha   |
| 8.67134     | 49.5211 | 1.80549E-4 | 0.1738  |
| 10.2243     | 39.684  | 1.53988E-4 | 0.12952 |
| 7.90081     | 33.0114 | 1.02608E-4 | 0.14413 |
| 7.80415     | 28.132  | 8.06073E-5 | 0.13825 |
| 7.43727     | 24.4497 | 6.15848E-5 | 0.14091 |
| 5.49536     | 21.5628 | 3.9337E-5  | 0.15687 |
| 2.59512     | 19.2577 | 2.20995E-5 | 0.17878 |
| 1.85508E-12 | 17.3831 | 1.23094E-5 | 0.2015  |
| 1.78953E-12 | 15.8167 | 8.67187E-6 | 0.21673 |
| 3.20567E-12 | 14.5003 | 6.27742E-6 | 0.23413 |
| 3.27229E-12 | 13.3821 | 4.75857E-6 | 0.2512  |
| Cluster 2   |         |            |         |
| 15.7664     | 33.9937 | 2.86092E-4 | 0.21657 |
| 15.1426     | 31.8292 | 2.70699E-4 | 0.21383 |
| 14.606      | 29.8411 | 2.59686E-4 | 0.20816 |
| 14.0686     | 28.0465 | 2.49847E-4 | 0.20308 |
| 13.5273     | 26.435  | 2.40314E-4 | 0.19918 |
| 13.0457     | 24.9662 | 2.31672E-4 | 0.19293 |
| 12.3109     | 22.8191 | 2.17056E-4 | 0.18158 |
| 11.6189     | 21.0041 | 1.99881E-4 | 0.16991 |

|                  |         |            |             |
|------------------|---------|------------|-------------|
| 11.0506          | 19.4284 | 1.82495E-4 | 0.15159     |
| 10.4974          | 18.0691 | 1.62795E-4 | 0.13447     |
| 10.0028          | 16.8865 | 1.43237E-4 | 0.1178      |
| 9.4813           | 15.8422 | 1.22721E-4 | 0.10281     |
| 9.0076           | 14.9234 | 1.04473E-4 | 0.09009     |
| 8.46449          | 14.1082 | 8.60956E-5 | 0.08363     |
| 8.00792          | 13.3766 | 7.1863E-5  | 0.07416     |
| 7.50159          | 12.7158 | 5.845E-5   | 0.06801     |
| <b>Cluster 3</b> |         |            |             |
| 54.9109          | 56.6814 | 4.75602E-4 | 2.1474E-9   |
| 47.5281          | 48.4221 | 5.27037E-4 | 5.94288E-9  |
| 41.8593          | 42.2959 | 6.87485E-4 | 5.41767E-9  |
| 37.4664          | 37.647  | 0.00103    | 6.97224E-9  |
| 33.9507          | 34.028  | 0.00161    | 9.42801E-9  |
| 31.1061          | 31.0603 | 0.00354    | 2.86696E-21 |
| 28.7367          | 28.6471 | 0.1041     | 5.75196E-20 |
| 26.7509          | 26.6749 | 0.04078    | 1.01317E-19 |
| 25.0608          | 25.0052 | 0.02888    | 1.45199E-19 |
| 23.6114          | 23.6114 | 0.02489    | 1.99487E-19 |
| 22.3436          | 22.2941 | 0.01976    | 2.6478E-19  |
| 21.2341          | 21.1888 | 0.02323    | 3.00671E-19 |
| 20.2461          | 20.1851 | 0.03368    | 1.86315E-19 |
| 19.3579          | 19.3243 | 0.06421    | 1.23708E-19 |

### Note 1

SQUEEZE and “Use Solvent Mask results” results for cluster **1-3** are as follows:

#### (1) Cluster 1

```

loop_
_platon_squeeze_void_nr
_platon_squeeze_void_average_x
_platon_squeeze_void_average_y
_platon_squeeze_void_average_z
_platon_squeeze_void_volume
_platon_squeeze_void_count_electrons
_platon_squeeze_void_content
1 0.000 0.000 0.000 872 244 "
```

A solvent mask was calculated, and 244 electrons were found in a volume of 872 Å<sup>3</sup> in 1 void per unit cell. This is consistent with the presence of 1[C<sub>2</sub>H<sub>3</sub>N], 10[H<sub>2</sub>O] per Asymmetric Unit which account for 244 electrons per unit cell. Further combined with elemental analysis and thermogravimetric analysis results (Figure S2), the molecular formula of cluster **1** is calculated to be [Dy<sub>5</sub>(HL<sup>1</sup>)<sub>2</sub>(L<sup>1</sup>)<sub>4</sub>(μ<sub>3</sub>-OH)<sub>2</sub>(NO<sub>3</sub>)<sub>3</sub>] $\cdot$ 2CH<sub>3</sub>CN $\cdot$ 10H<sub>2</sub>O

## (2) Cluster 2

```
loop_
  _smtbx_masks_void_nr
  _smtbx_masks_void_average_x
  _smtbx_masks_void_average_y
  _smtbx_masks_void_average_z
  _smtbx_masks_void_volume
  _smtbx_masks_void_count_electrons
  _smtbx_masks_void_content
  1 0.491 0.000 0.500 611.3 145.3 '0.5 12[CH3CN]2[H2O]'
  2 0.032 0.500 0.000 611.3 145.3 '0.5 12[CH3CN]2[H2O]'
```

Further combined with elemental analysis and thermogravimetric analysis results (Figure S2), the molecular formula of cluster **2** is calculated to be  $[\text{Dy}_8(\text{HL}^2)_6(\mu_3\text{-OH})_4(\mu_2\text{-OH})_2(\text{NO}_3)_4(\text{OCH}_3)_2(\text{H}_2\text{O})_2] \cdot 6\text{CH}_3\text{CN} \cdot \text{H}_2\text{O}$

## (3) Cluster 3

```
loop_
  _platon_squeeze_void_nr
  _platon_squeeze_void_average_x
  _platon_squeeze_void_average_y
  _platon_squeeze_void_average_z
  _platon_squeeze_void_volume
  _platon_squeeze_void_count_electrons
  _platon_squeeze_void_content
  1 0.441 0.087 -0.048 10066 2912 '92 MeCN,92 H2O'
  2 0.000 0.000 0.000 421 77 '2 MeCN, 2 H2O'
  3 0.899 0.178 0.765 9 -1 ''
  4 0.399 0.322 0.265 10 -1 ''
  5 0.500 0.500 0.500 421 77 '2 MeCN, 2 H2O'
  6 0.601 0.678 0.735 9 -1 ''
  7 0.101 0.822 0.235 9 -1 ''
```

A solvent mask was calculated and 3063 electrons were found in a volume of 10935 Å<sup>3</sup> in 3 voids per unit cell. This is consistent with the presence of 23[C<sub>2</sub>H<sub>3</sub>N], 23[H<sub>2</sub>O], 1[C<sub>2</sub>H<sub>3</sub>N], 1[H<sub>2</sub>O], per Asymmetric Unit which account for 3072 electrons per unit cell. Therefore, the molecular formula of cluster **3** is calculated to be  $[\text{Dy}_{14}(\text{HL}^3)_7(\text{OAc})_{28}] \cdot 24\text{CH}_3\text{CN} \cdot 31\text{H}_2\text{O}$ .
